# Supplementary material for: Optimal Network for Patients with Severe Mental Illness: A Social Network Analysis
Source: PubMed Central journal article supplement (PMC5640746; doi:10.1007/s10488-017-0800-7), 2017-03-24
Supplement: 10488_2017_800_MOESM2_ESM.pdf [file 10488_2017_800_MOESM2_ESM.pdf]

|                        | P6   |
|------------------------|------|
| Size                   | 11   |
| Density                | 0,74 |
| All-deg centralization | 3,22 |
| Betw centralization    | 0,14 |

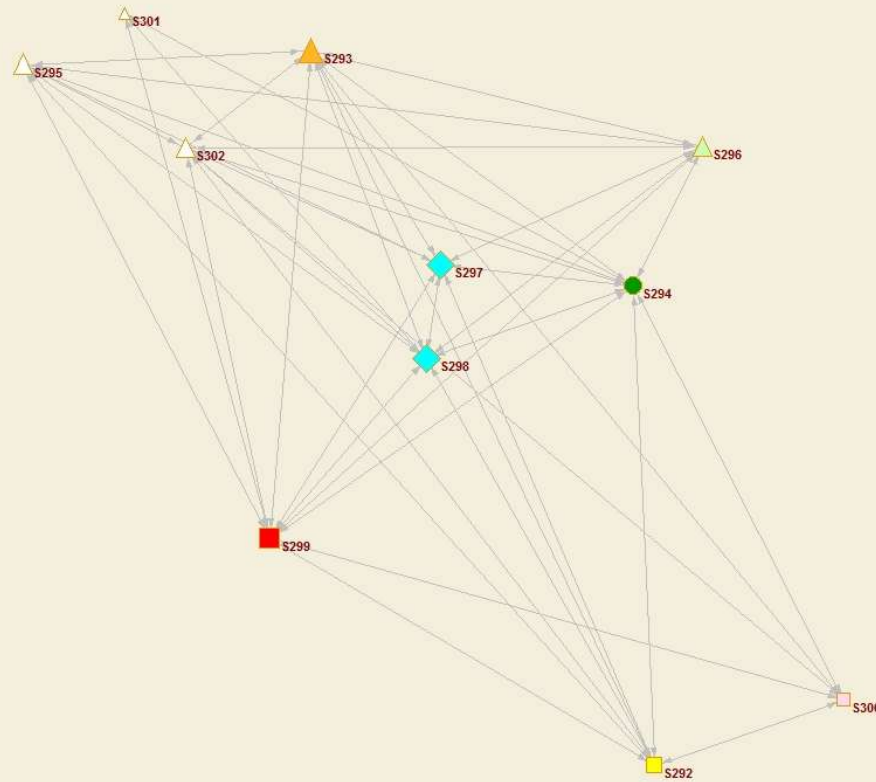

| Service type                   | Symbol |
|--------------------------------|--------|
| Primary Care                   |        |
| Community Mental Health        |        |
| Outreach Team                  |        |
| Community rehabilitation       |        |
| Social service                 |        |
| Ward in psychiatric hospital   |        |
| Psychiatric Ward General Hosp. |        |
| Sheltered accommodation        |        |
| Psychiatric Nursing Home       |        |
| Self-Help                      |        |
| Other                          |        |

|                        |            |
|------------------------|------------|
|                        | <b>P19</b> |
| Size                   | 15         |
| Density                | 0,65       |
| All-deg centralization | 5,69       |
| Betw centralization    | 0,09       |

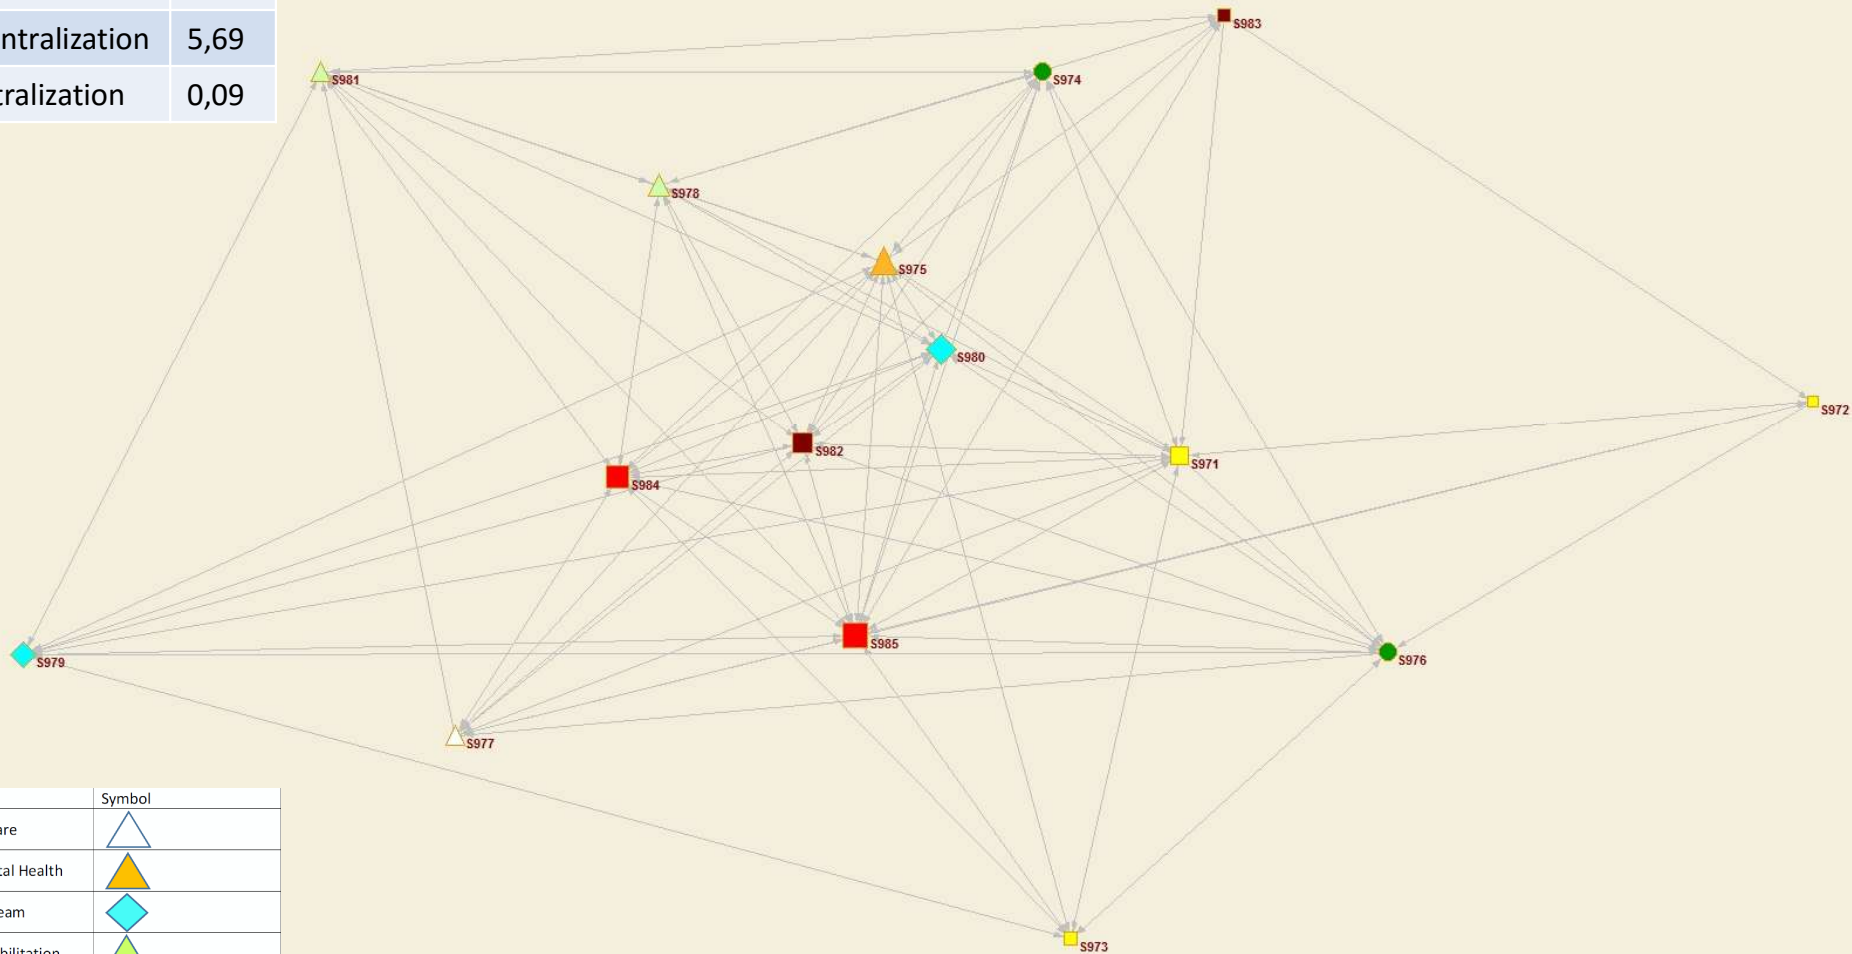

| Service type                   | Symbol |
|--------------------------------|--------|
| Primary Care                   |        |
| Community Mental Health        |        |
| Outreach Team                  |        |
| Community rehabilitation       |        |
| Social service                 |        |
| Ward in psychiatric hospital   |        |
| Psychiatric Ward General Hosp. |        |
| Sheltered accommodation        |        |
| Psychiatric Nursing Home       |        |
| Self-Help                      |        |
| Other                          |        |

|                        |           |
|------------------------|-----------|
|                        | <b>P3</b> |
| Size                   | 20        |
| Density                | 0,63      |
| All-deg centralization | 6,72      |
| Betw centralization    | 0,07      |

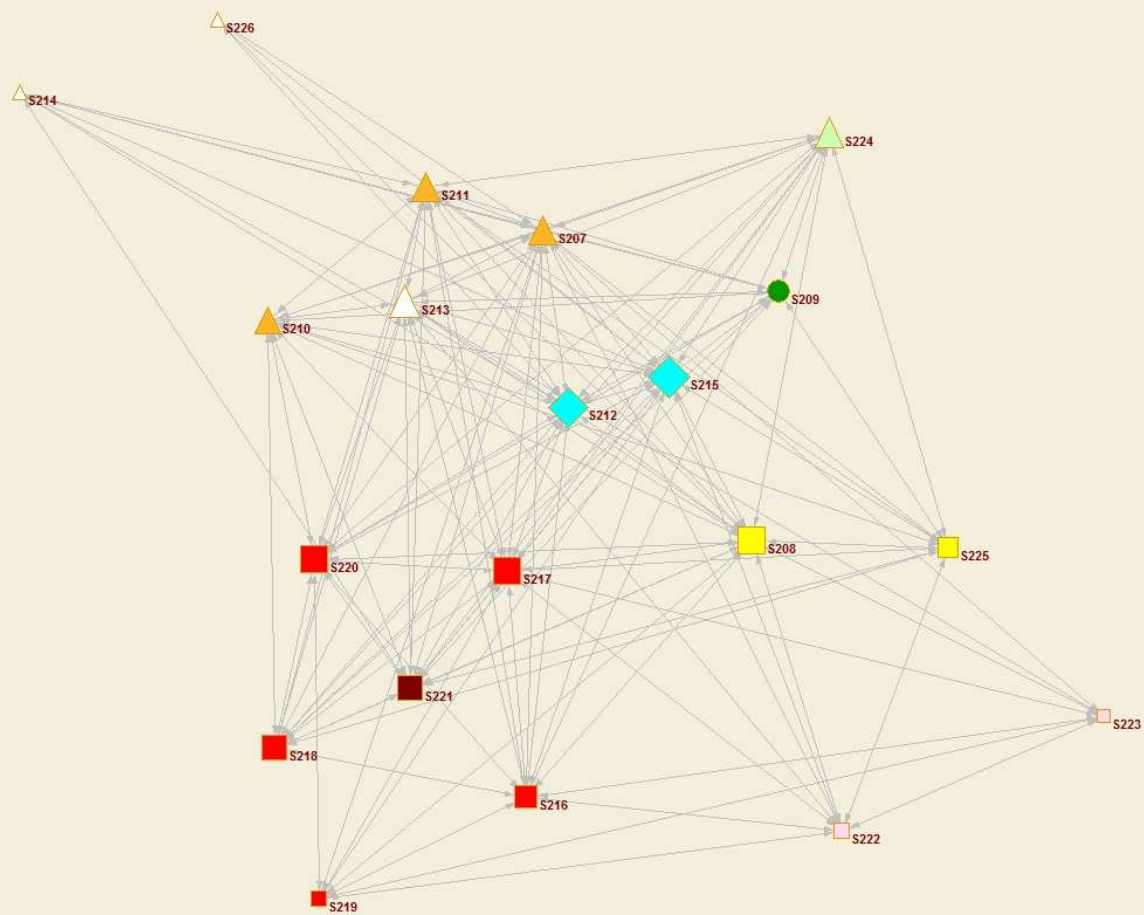

| Service type                   | Symbol               |
|--------------------------------|----------------------|
| Primary Care                   | White triangle       |
| Community Mental Health        | Orange triangle      |
| Outreach Team                  | Cyan diamond         |
| Community rehabilitation       | Light green triangle |
| Social service                 | Green circle         |
| Ward in psychiatric hospital   | Red square           |
| Psychiatric Ward General Hosp. | Brown square         |
| Sheltered accommodation        | Yellow square        |
| Psychiatric Nursing Home       | Pink square          |
| Self-Help                      | Black circle         |
| Other                          | Grey circle          |

|                        |      |
|------------------------|------|
|                        | P8   |
| Size                   | 28   |
| Density                | 0,67 |
| All-deg centralization | 9,15 |
| Betw centralization    | 0,04 |

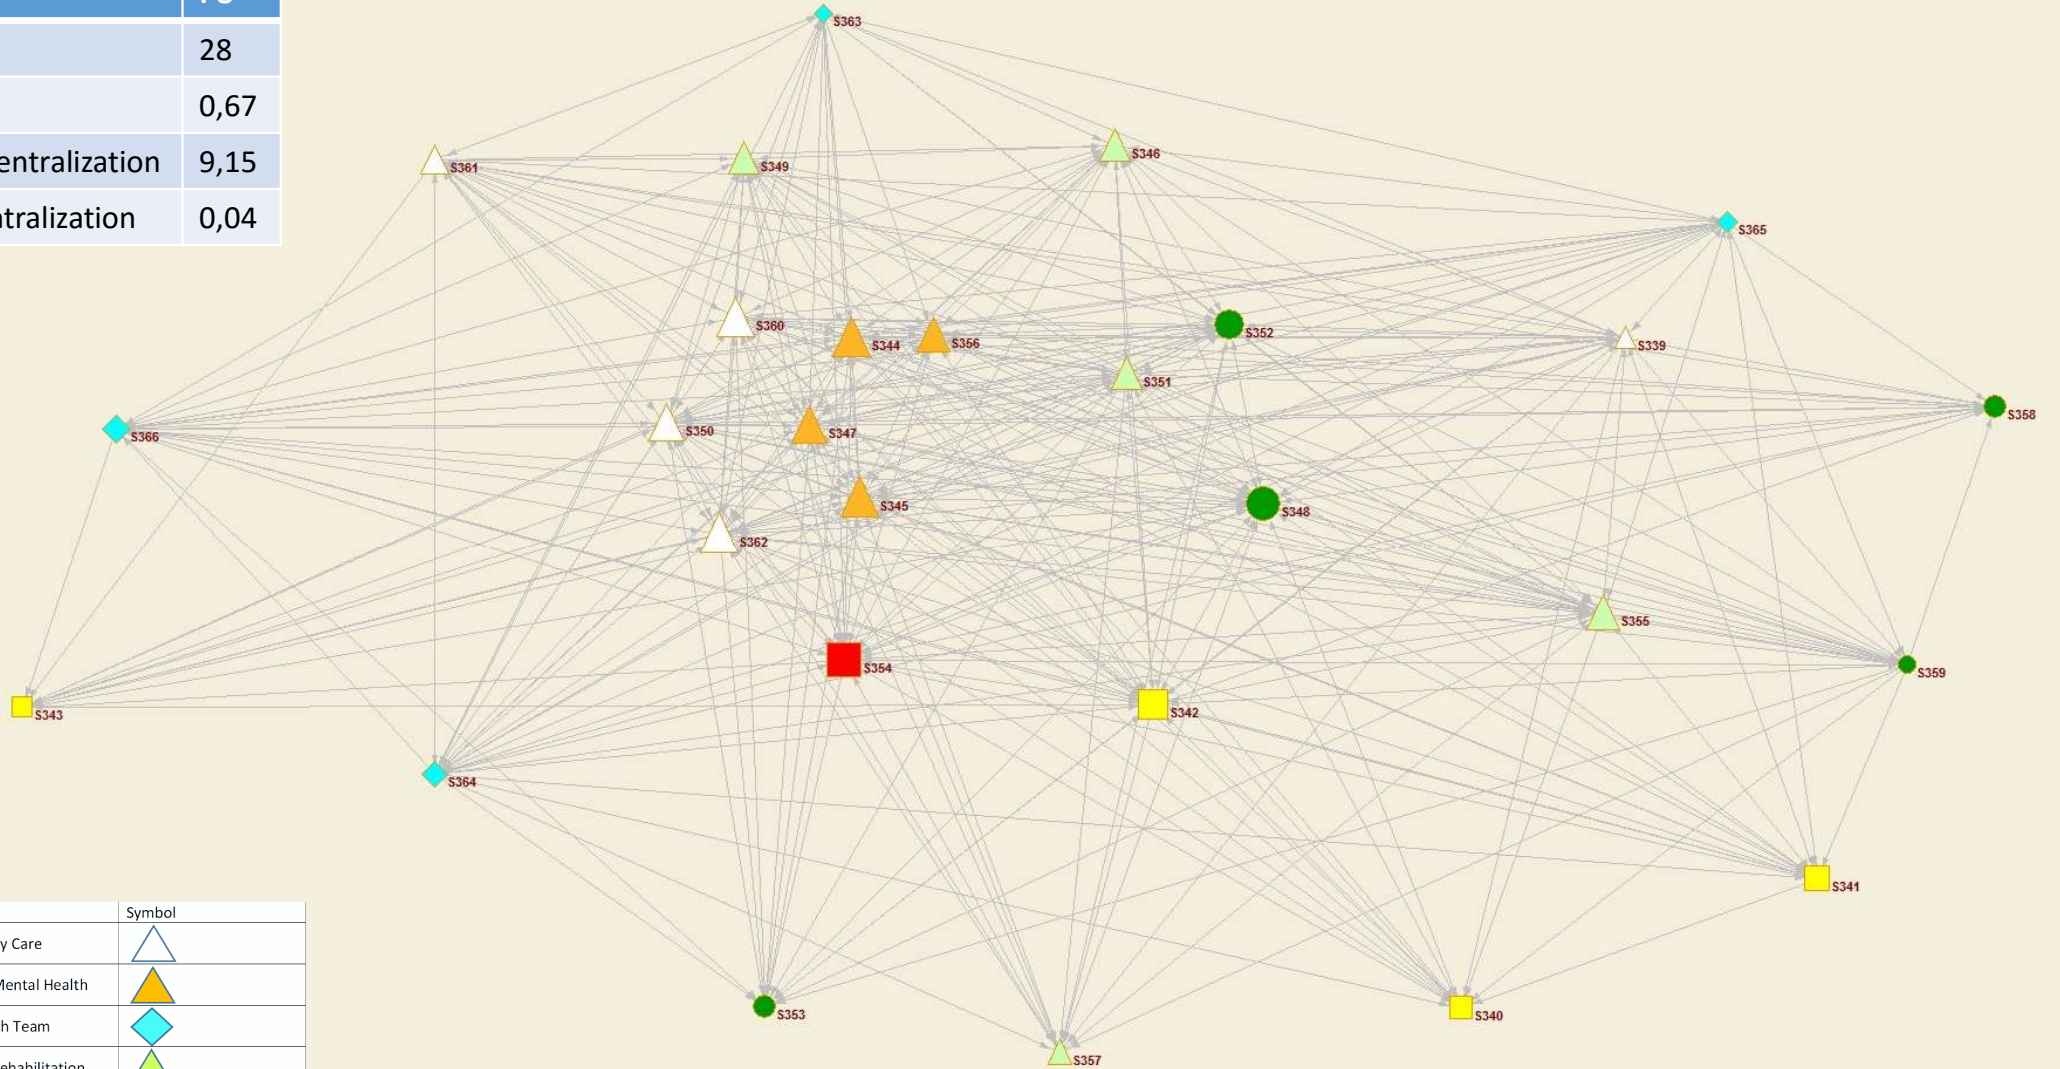

| Service type                   | Symbol               |
|--------------------------------|----------------------|
| Primary Care                   | White triangle       |
| Community Mental Health        | Orange triangle      |
| Outreach Team                  | Cyan diamond         |
| Community rehabilitation       | Light green triangle |
| Social service                 | Green circle         |
| Ward in psychiatric hospital   | Red square           |
| Psychiatric Ward General Hosp. | Brown square         |
| Sheltered accommodation        | Yellow square        |
| Psychiatric Nursing Home       | Pink square          |
| Self-Help                      | Black circle         |
| Other                          | Grey circle          |

|                        | P4    |
|------------------------|-------|
| Size                   | 29    |
| Density                | 0,21  |
| All-deg centralization | 19,87 |
| Betw centralization    | 0,37  |

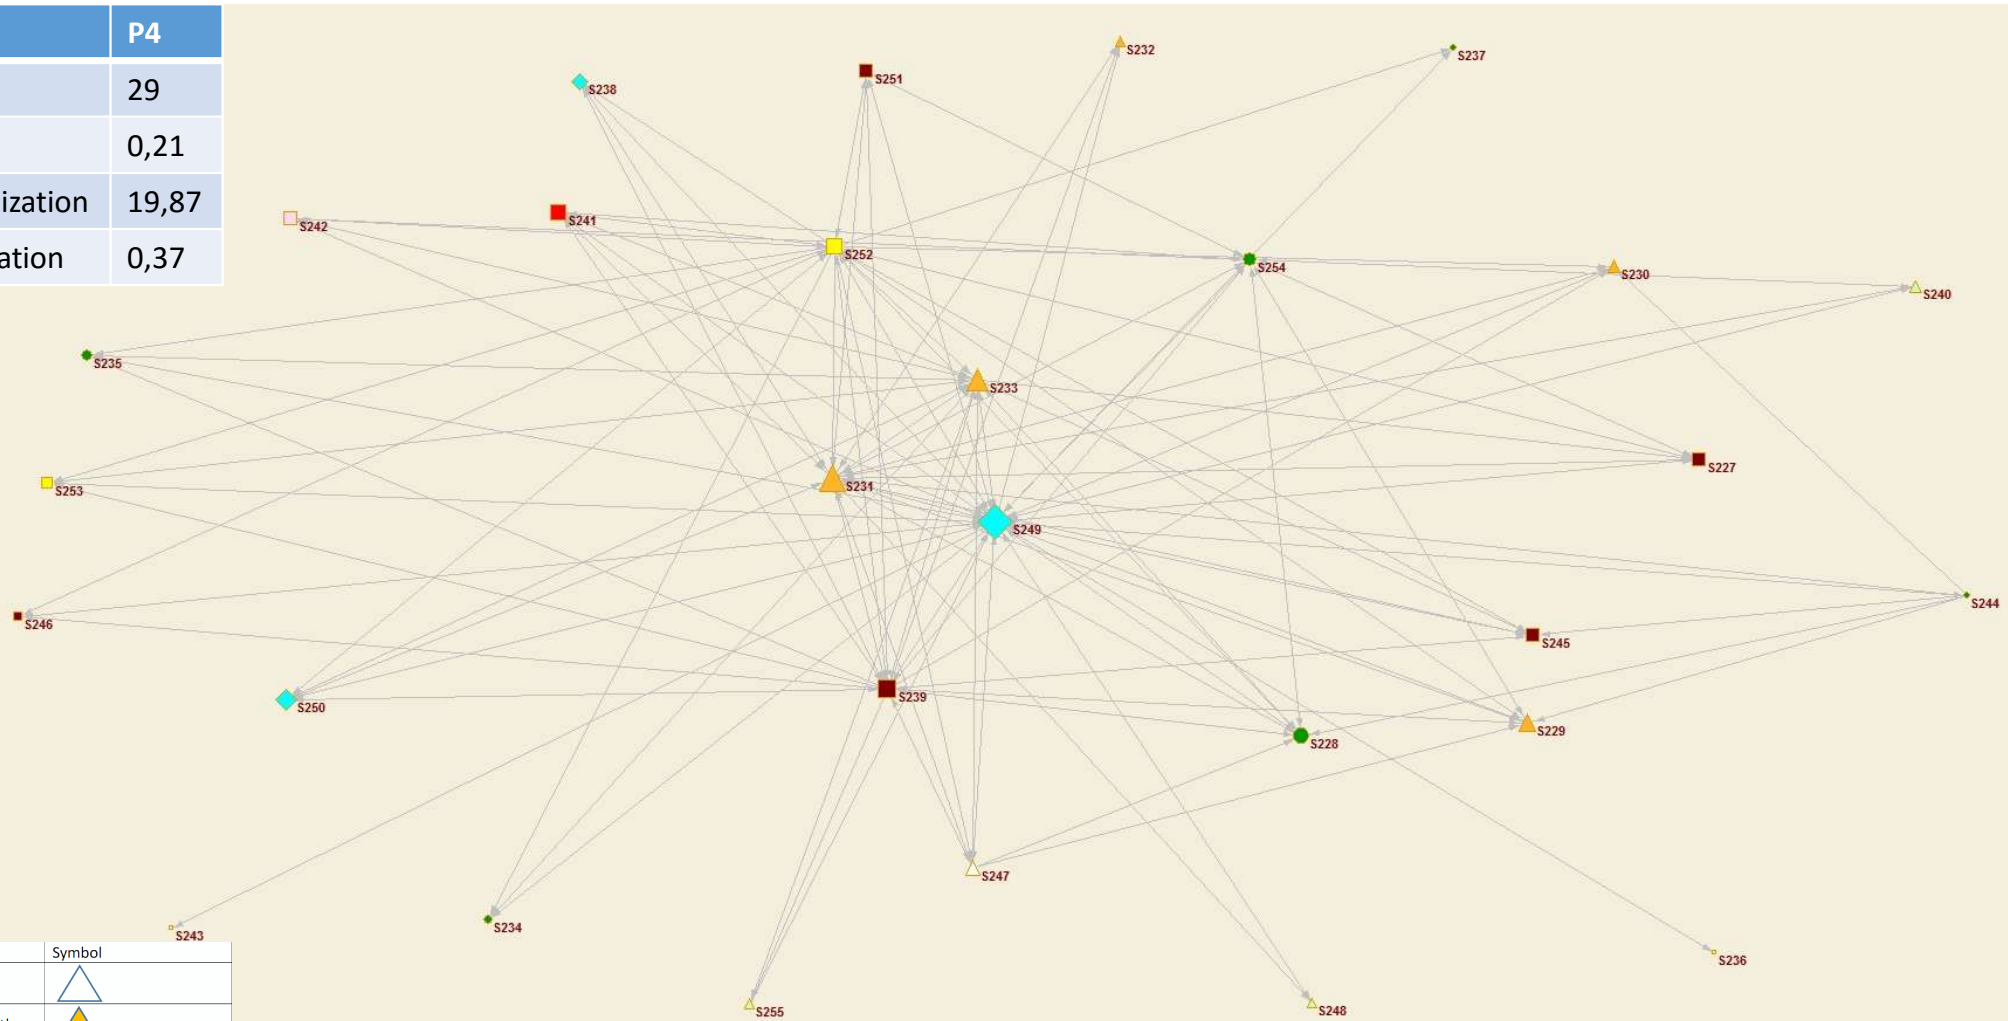

| Service type                   | Symbol               |
|--------------------------------|----------------------|
| Primary Care                   | White triangle       |
| Community Mental Health        | Yellow triangle      |
| Outreach Team                  | Cyan diamond         |
| Community rehabilitation       | Light green triangle |
| Social service                 | Green circle         |
| Ward in psychiatric hospital   | Red square           |
| Psychiatric Ward General Hosp. | Brown square         |
| Sheltered accommodation        | Yellow square        |
| Psychiatric Nursing Home       | Pink square          |
| Self-Help                      | Black circle         |
| Other                          | Grey circle          |

|                        |            |
|------------------------|------------|
|                        | <b>P16</b> |
| Size                   | 30         |
| Density                | 0,57       |
| All-deg centralization | 13,50      |
| Betw centralization    | 0,07       |

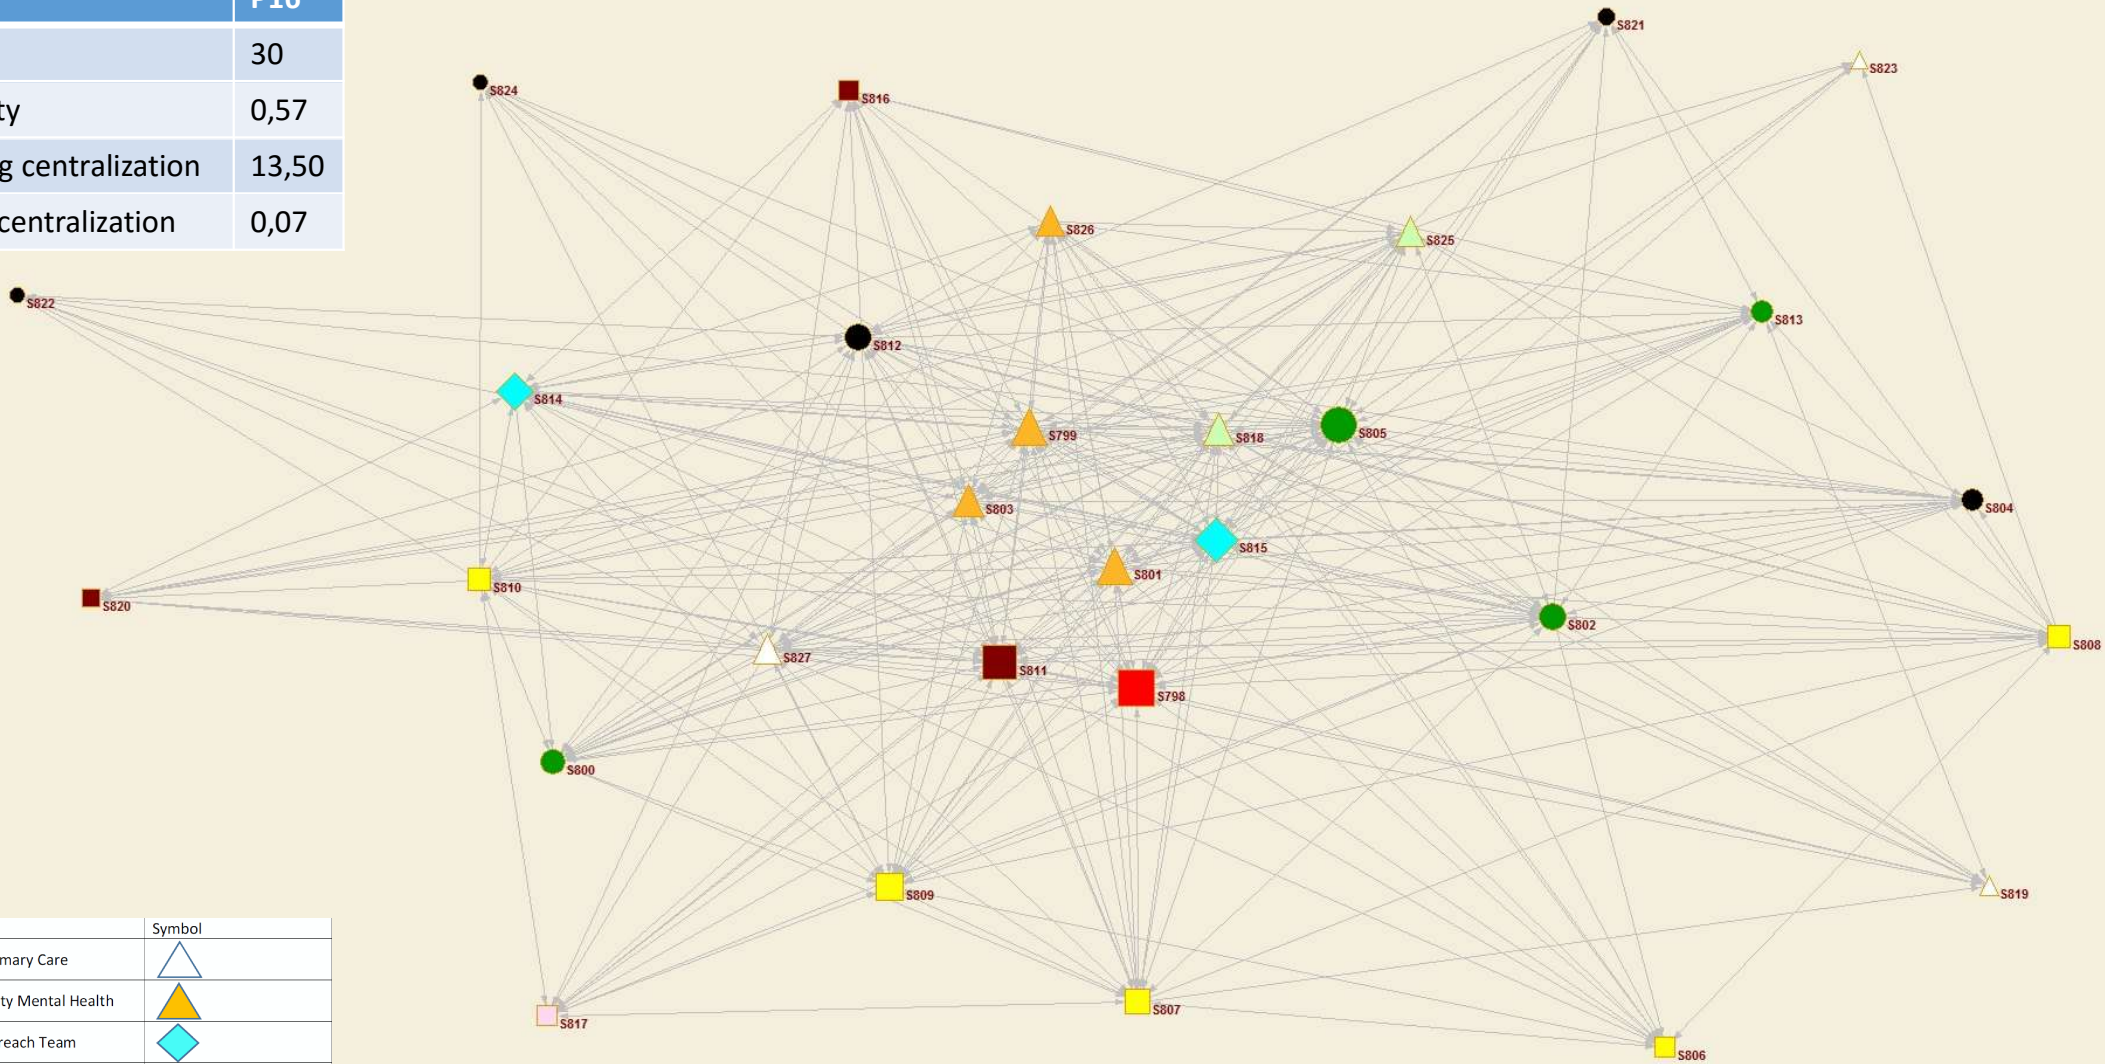

| Service type                   | Symbol               |
|--------------------------------|----------------------|
| Primary Care                   | Blue triangle        |
| Community Mental Health        | Orange triangle      |
| Outreach Team                  | Cyan diamond         |
| Community rehabilitation       | Light green triangle |
| Social service                 | Green circle         |
| Ward in psychiatric hospital   | Red square           |
| Psychiatric Ward General Hosp. | Brown square         |
| Sheltered accommodation        | Yellow square        |
| Psychiatric Nursing Home       | Pink square          |
| Self-Help                      | Black circle         |
| Other                          | Grey circle          |

|                        |            |
|------------------------|------------|
|                        | <b>P11</b> |
| Size                   | 33         |
| Density                | 0,37       |
| All-deg centralization | 18,42      |
| Betw centralization    | 0,14       |

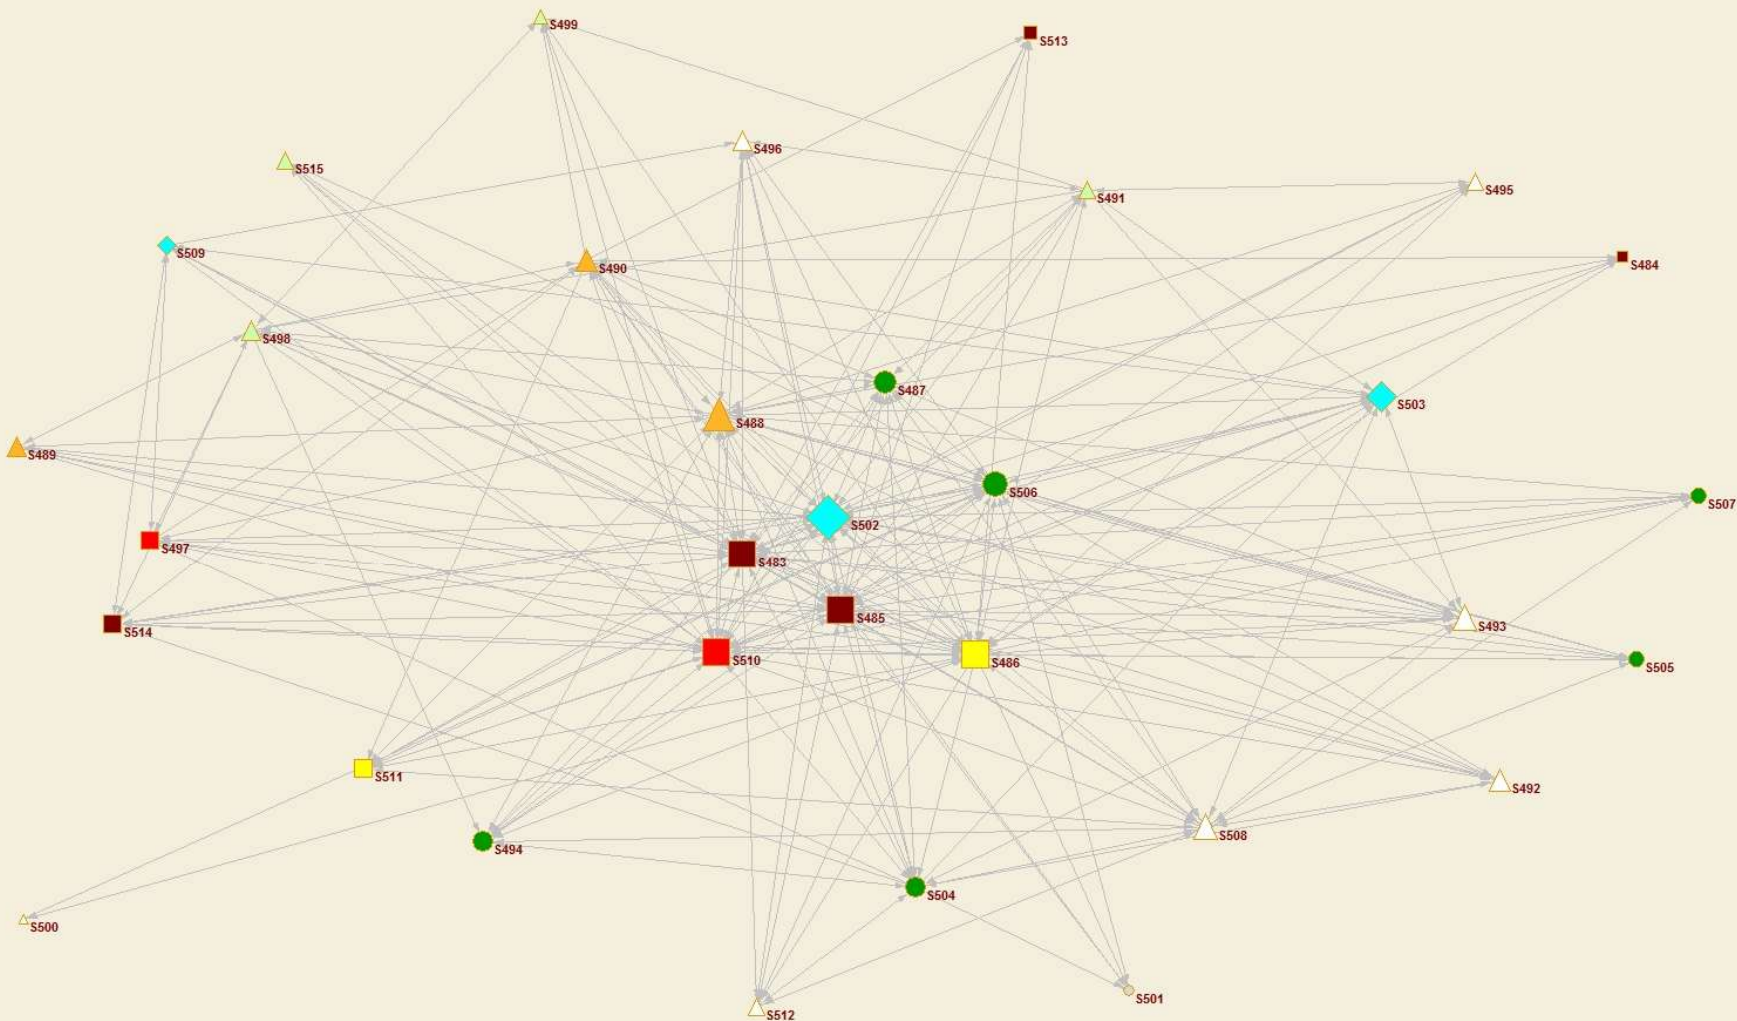

| Service type                   | Symbol               |
|--------------------------------|----------------------|
| Primary Care                   | White triangle       |
| Community Mental Health        | Orange triangle      |
| Outreach Team                  | Cyan diamond         |
| Community rehabilitation       | Light green triangle |
| Social service                 | Green circle         |
| Ward in psychiatric hospital   | Red square           |
| Psychiatric Ward General Hosp. | Brown square         |
| Sheltered accommodation        | Yellow square        |
| Psychiatric Nursing Home       | Pink square          |
| Self-Help                      | Black circle         |
| Other                          | Grey circle          |

|                        |           |
|------------------------|-----------|
|                        | <b>P7</b> |
| Size                   | 36        |
| Density                | 0,40      |
| All-deg centralization | 16,97     |
| Betw centralization    | 0,09      |

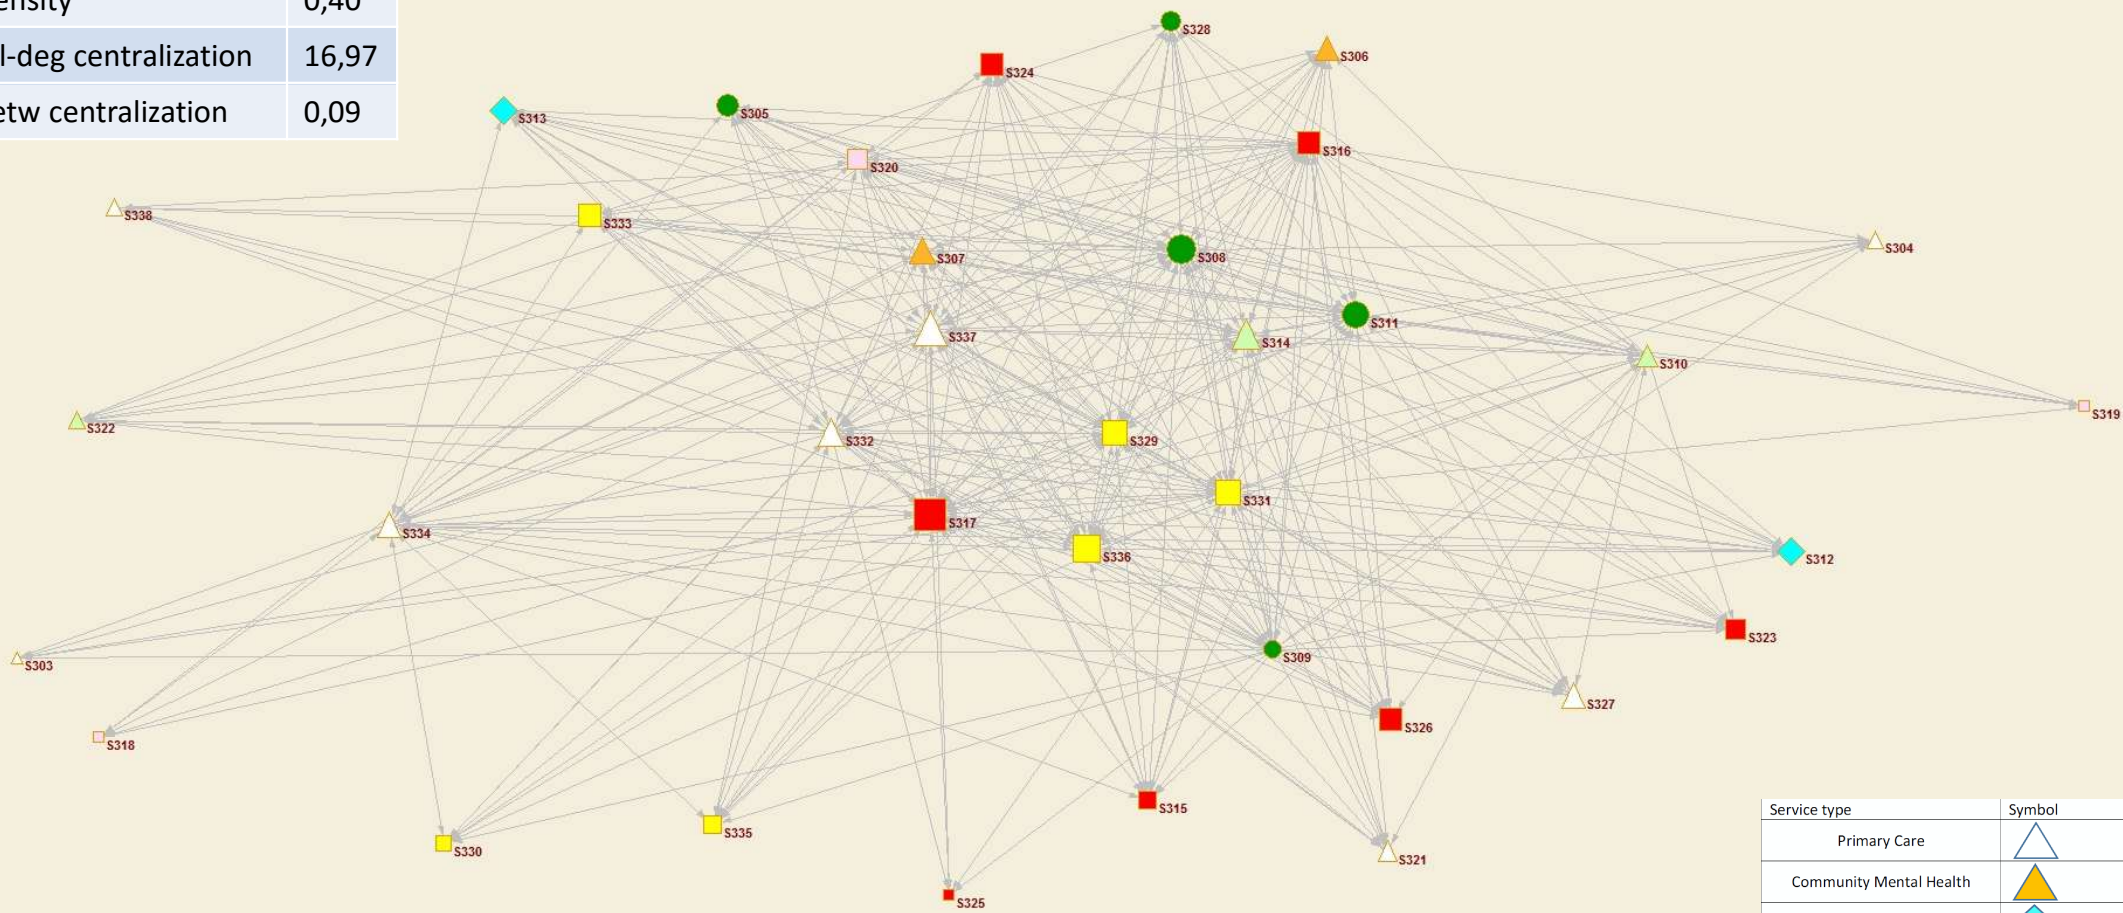

| Service type                   | Symbol               |
|--------------------------------|----------------------|
| Primary Care                   | White triangle       |
| Community Mental Health        | Orange triangle      |
| Outreach Team                  | Cyan diamond         |
| Community rehabilitation       | Light green triangle |
| Social service                 | Green circle         |
| Ward in psychiatric hospital   | Red square           |
| Psychiatric Ward General Hosp. | Brown square         |
| Sheltered accommodation        | Yellow square        |
| Psychiatric Nursing Home       | Pink square          |
| Self-Help                      | Black circle         |
| Other                          | Grey circle          |



|                        |       |
|------------------------|-------|
|                        | P5    |
| Size                   | 36    |
| Density                | 0,35  |
| All-deg centralization | 22,06 |
| Betw centralization    | 0,26  |

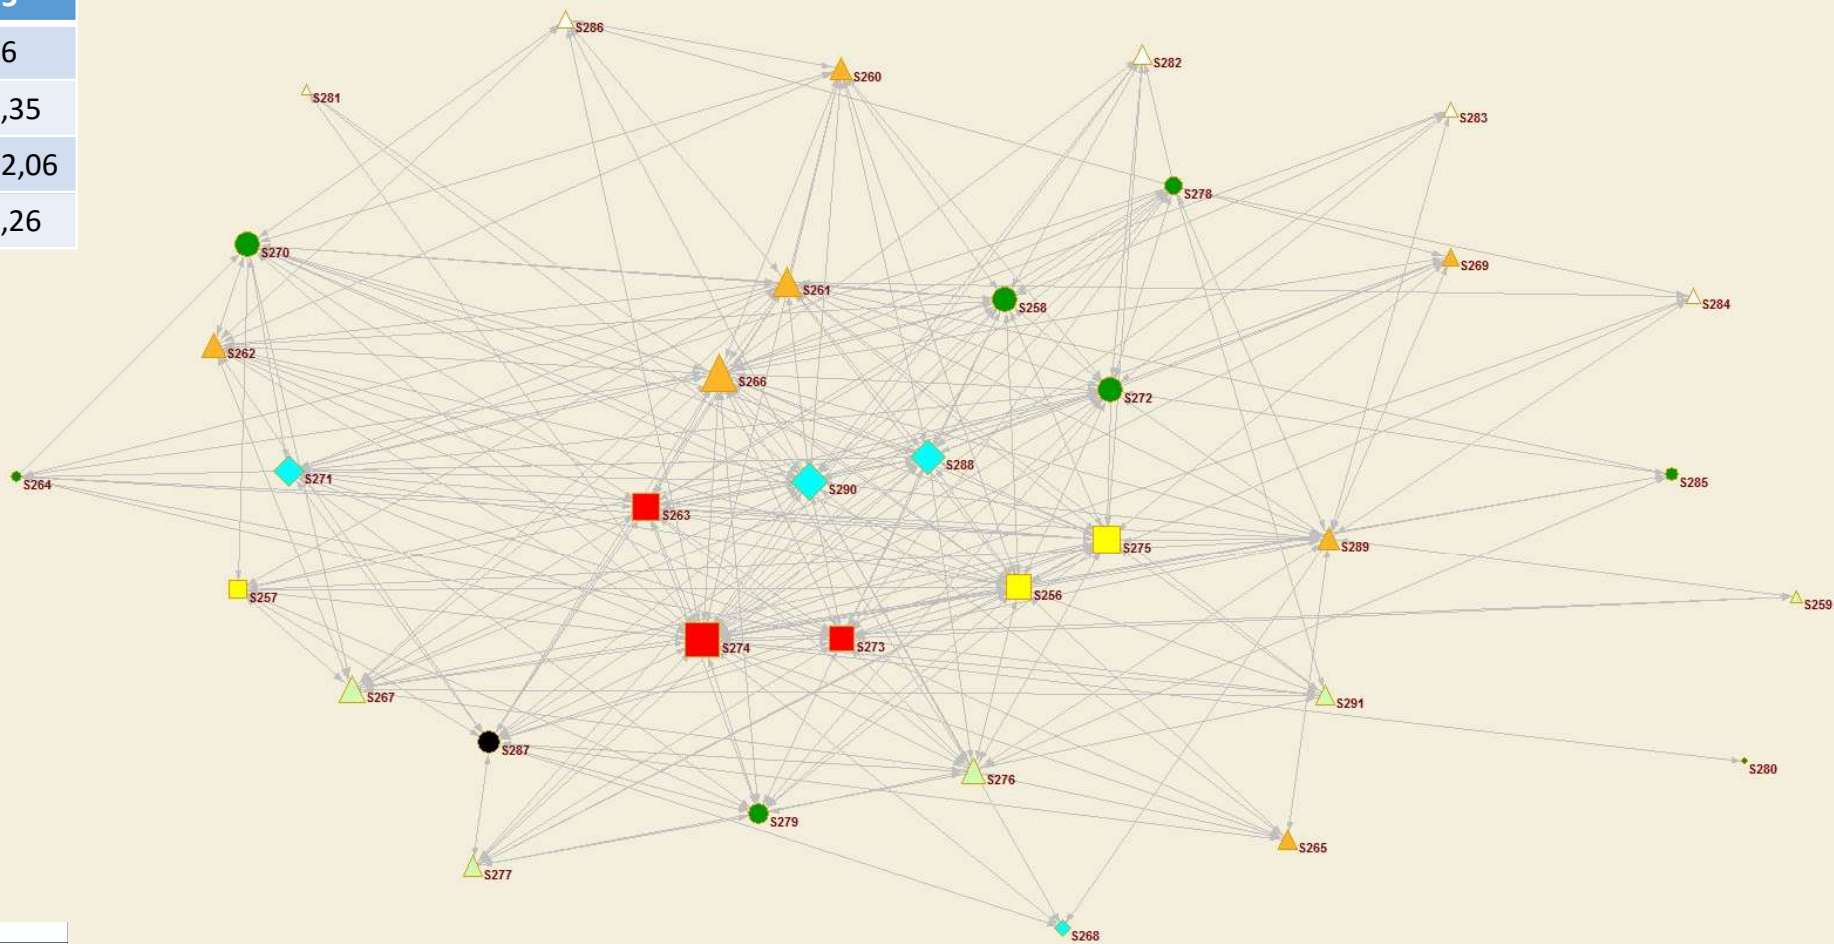

| Service type                   | Symbol |
|--------------------------------|--------|
| Primary Care                   |        |
| Community Mental Health        |        |
| Outreach Team                  |        |
| Community rehabilitation       |        |
| Social service                 |        |
| Ward in psychiatric hospital   |        |
| Psychiatric Ward General Hosp. |        |
| Sheltered accommodation        |        |
| Psychiatric Nursing Home       |        |
| Self-Help                      |        |
| Other                          |        |

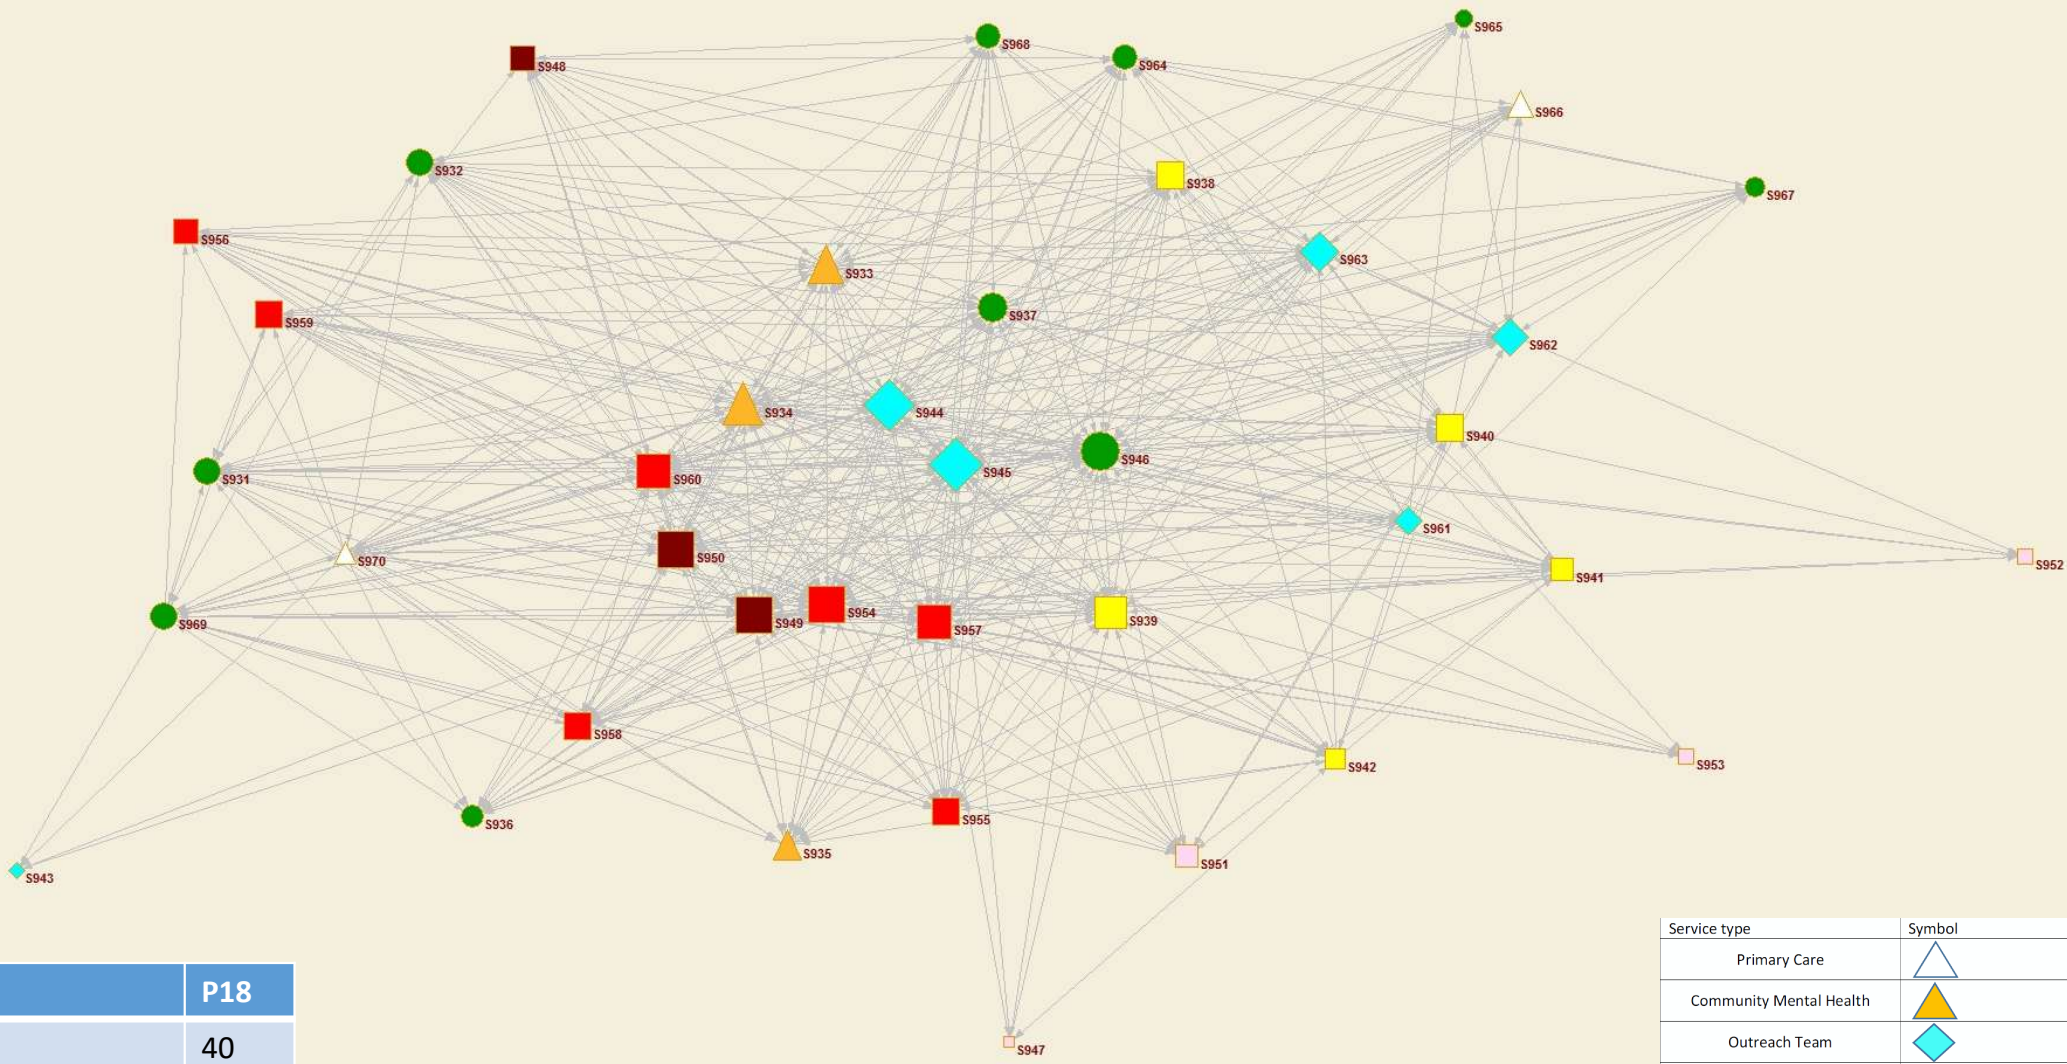

|                        |            |
|------------------------|------------|
|                        | <b>P18</b> |
| Size                   | 40         |
| Density                | 0,50       |
| All-deg centralization | 20,42      |
| Betw centralization    | 0,10       |

| Service type                   | Symbol |
|--------------------------------|--------|
| Primary Care                   |        |
| Community Mental Health        |        |
| Outreach Team                  |        |
| Community rehabilitation       |        |
| Social service                 |        |
| Ward in psychiatric hospital   |        |
| Psychiatric Ward General Hosp. |        |
| Sheltered accommodation        |        |
| Psychiatric Nursing Home       |        |
| Self-Help                      |        |
| Other                          |        |

|                        | P9    |
|------------------------|-------|
| Size                   | 41    |
| Density                | 0,41  |
| All-deg centralization | 24,64 |
| Betw centralization    | 0,11  |

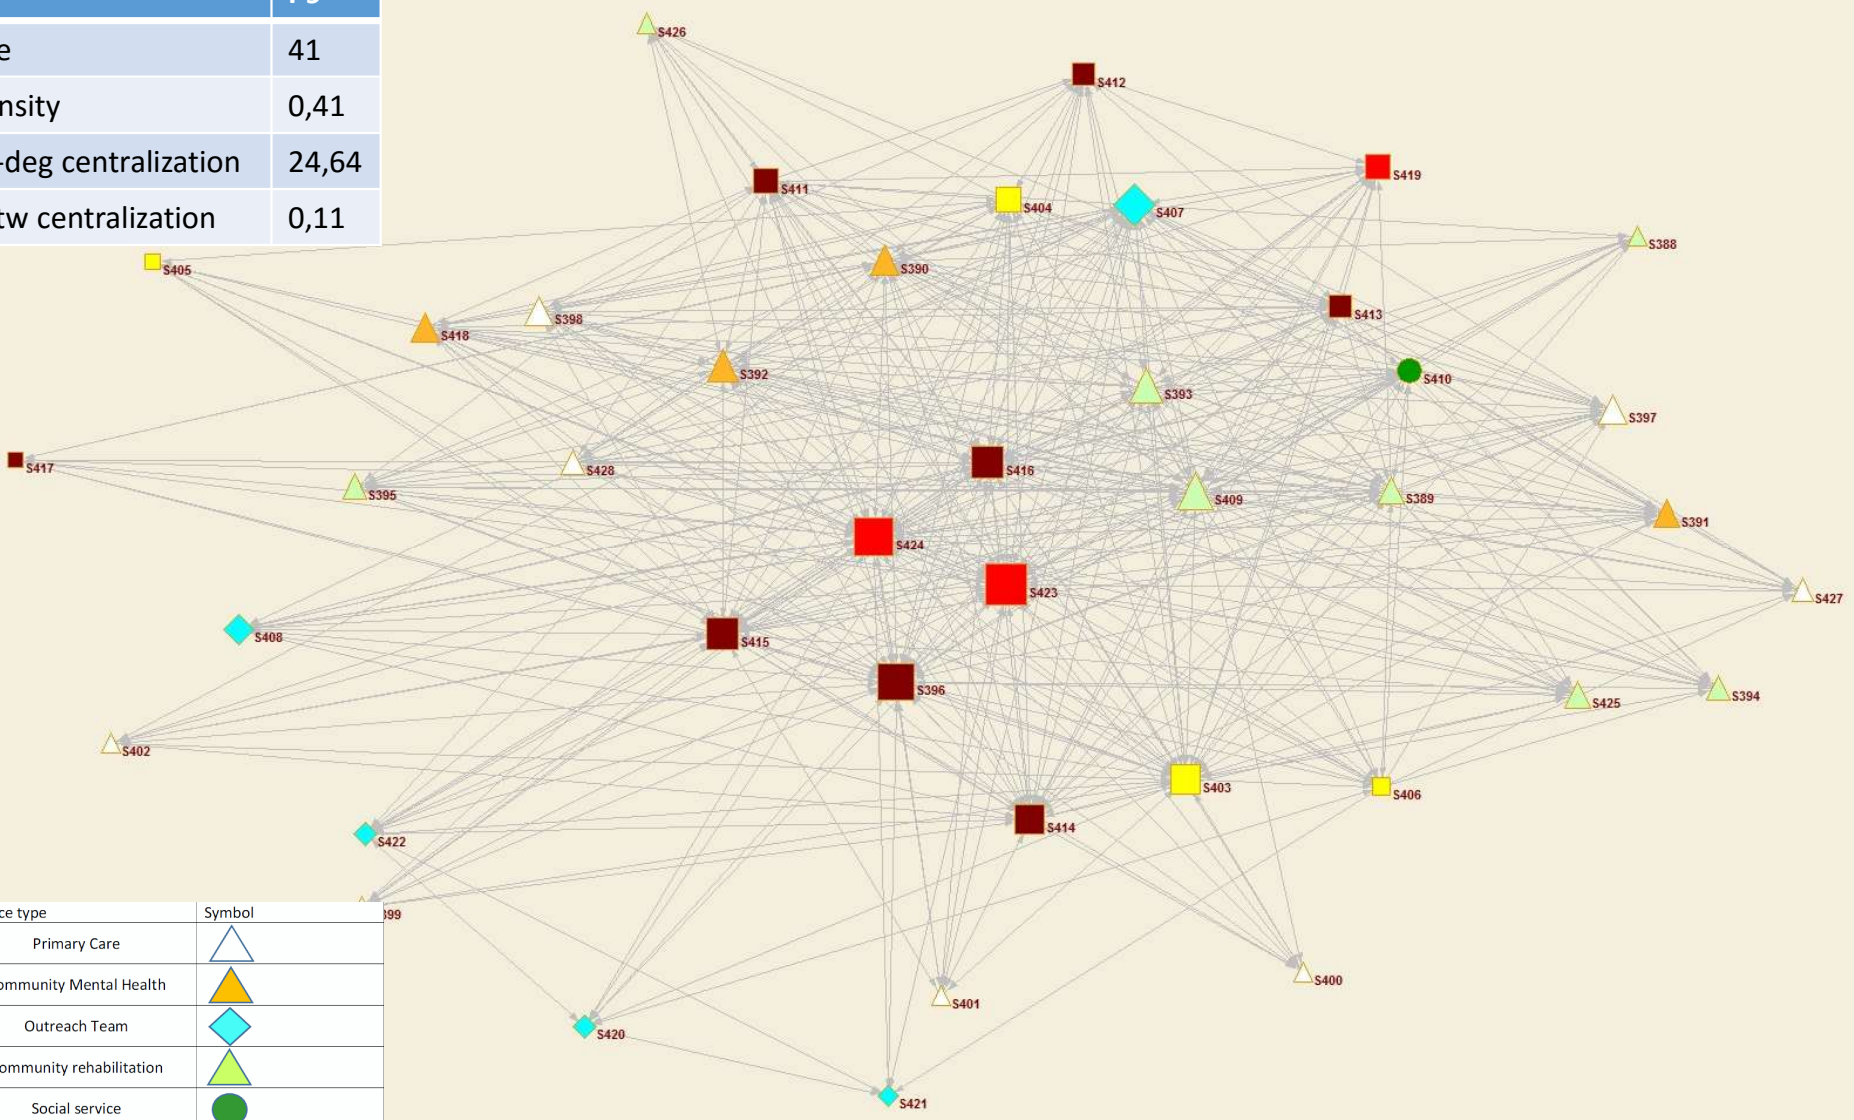

| Service type                   | Symbol               |
|--------------------------------|----------------------|
| Primary Care                   | White triangle       |
| Community Mental Health        | Orange triangle      |
| Outreach Team                  | Cyan diamond         |
| Community rehabilitation       | Light green triangle |
| Social service                 | Green circle         |
| Ward in psychiatric hospital   | Red square           |
| Psychiatric Ward General Hosp. | Brown square         |
| Sheltered accommodation        | Yellow square        |
| Psychiatric Nursing Home       | Pink square          |
| Self-Help                      | Black circle         |
| Other                          | Grey circle          |

|                        |       |
|------------------------|-------|
|                        | P10   |
| Size                   | 54    |
| Density                | 0,58  |
| All-deg centralization | 22,06 |
| Betw centralization    | 0,03  |

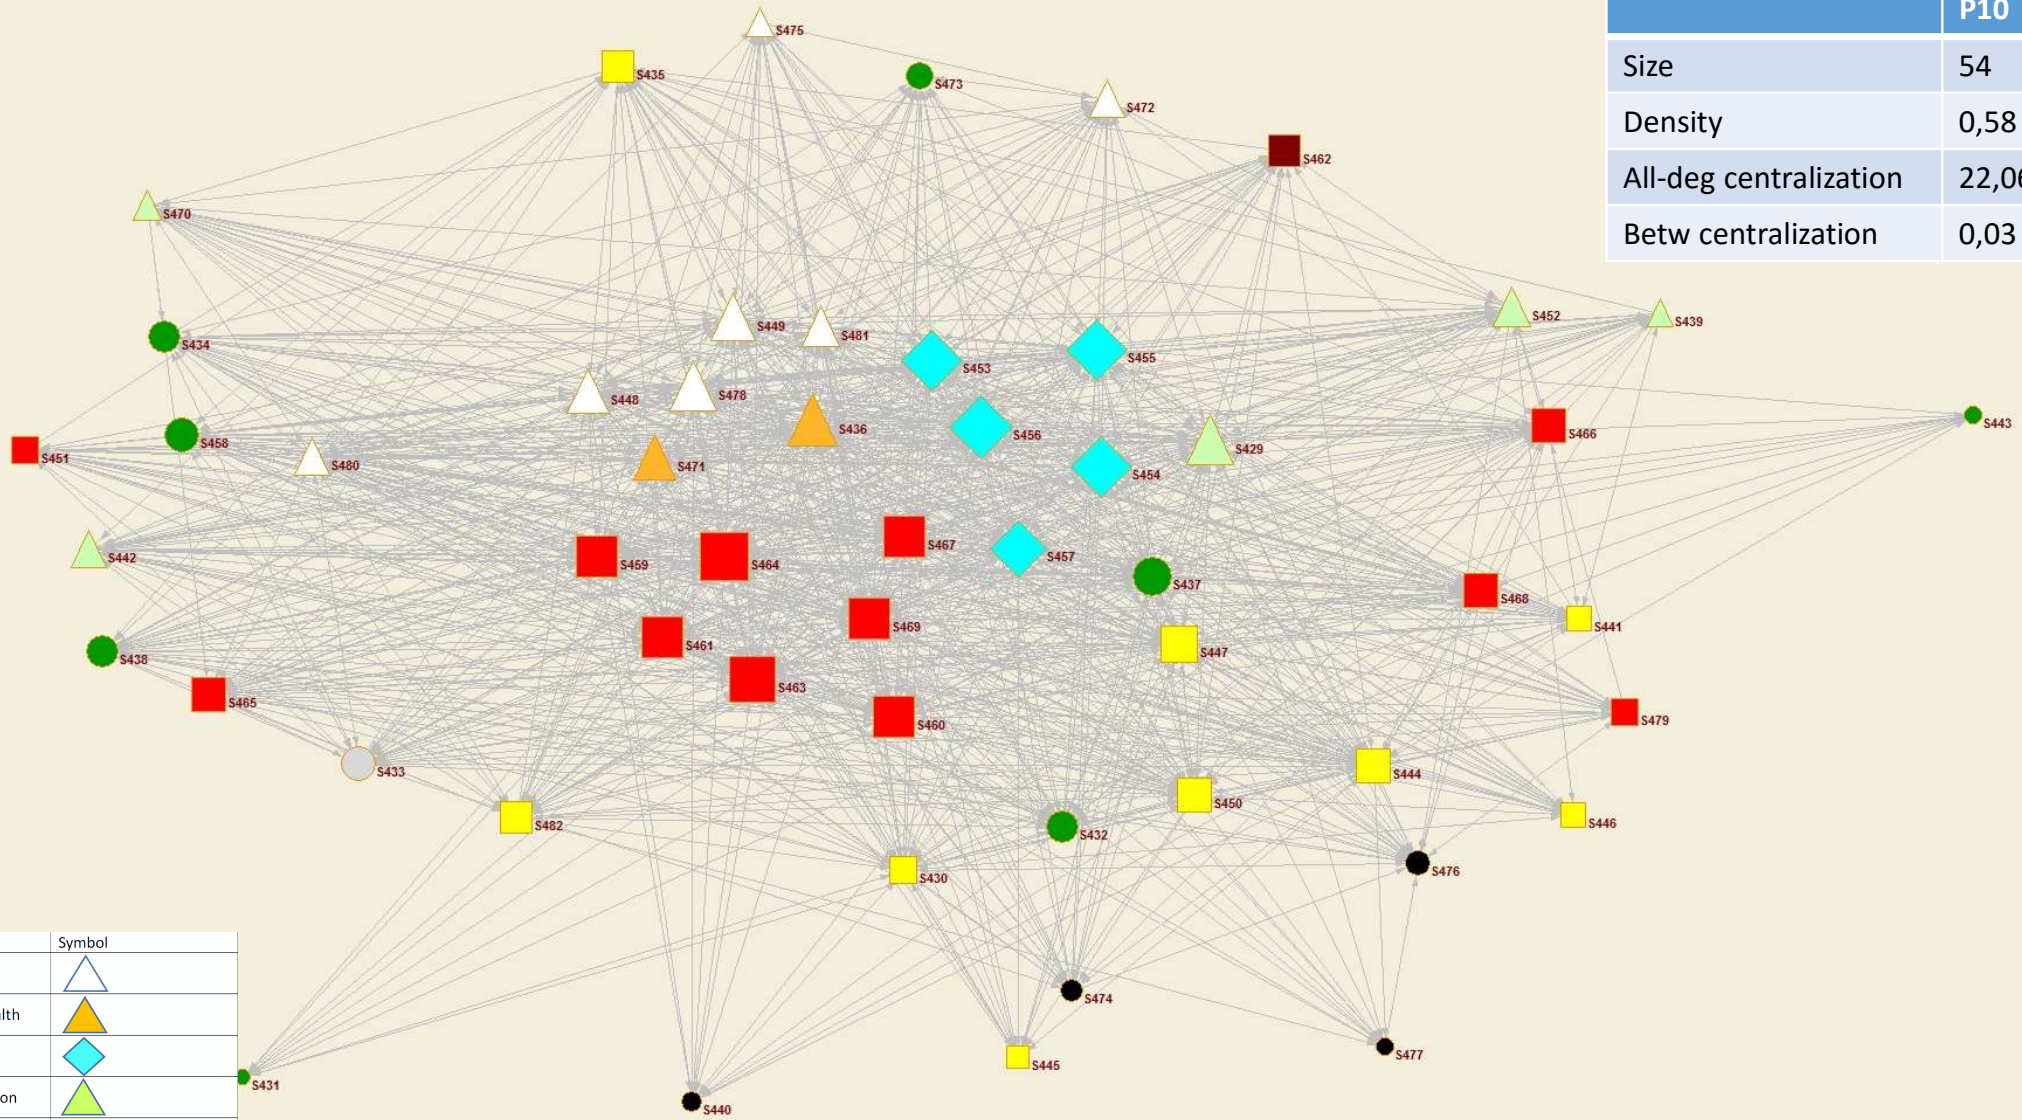

| Service type                   | Symbol               |
|--------------------------------|----------------------|
| Primary Care                   | White triangle       |
| Community Mental Health        | Orange triangle      |
| Outreach Team                  | Cyan diamond         |
| Community rehabilitation       | Light green triangle |
| Social service                 | Green circle         |
| Ward in psychiatric hospital   | Red square           |
| Psychiatric Ward General Hosp. | Brown square         |
| Sheltered accommodation        | Yellow square        |
| Psychiatric Nursing Home       | Pink square          |
| Self-Help                      | Black circle         |
| Other                          | Grey circle          |

|                        |            |
|------------------------|------------|
|                        | <b>P12</b> |
| Size                   | 60         |
| Density                | 0,23       |
| All-deg centralization | 33,12      |
| Betw centralization    | 0,16       |

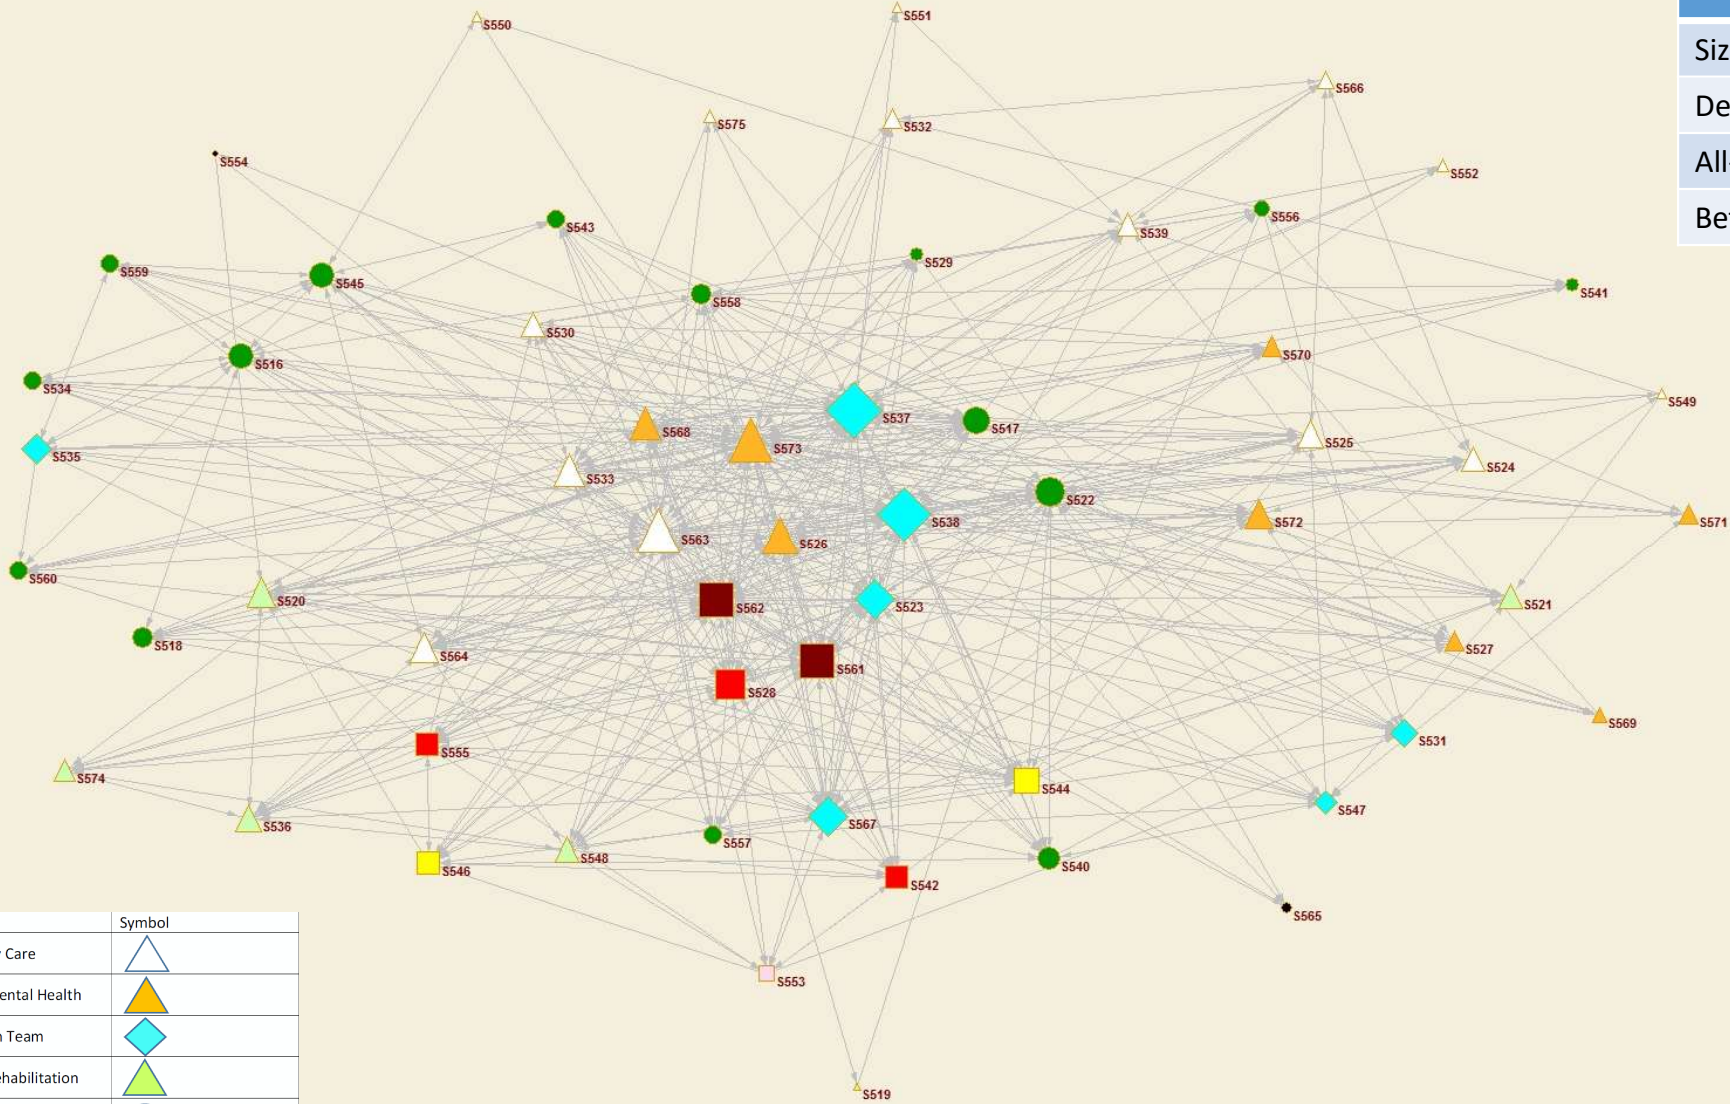

| Service type                   | Symbol               |
|--------------------------------|----------------------|
| Primary Care                   | White triangle       |
| Community Mental Health        | Orange triangle      |
| Outreach Team                  | Cyan diamond         |
| Community rehabilitation       | Light green triangle |
| Social service                 | Green circle         |
| Ward in psychiatric hospital   | Red square           |
| Psychiatric Ward General Hosp. | Brown square         |
| Sheltered accommodation        | Yellow square        |
| Psychiatric Nursing Home       | Pink square          |
| Self-Help                      | Black circle         |
| Other                          | Grey circle          |

|                        |       |
|------------------------|-------|
|                        | P14   |
| Size                   | 67    |
| Density                | 0,31  |
| All-deg centralization | 36,85 |
| Betw centralization    | 0,08  |

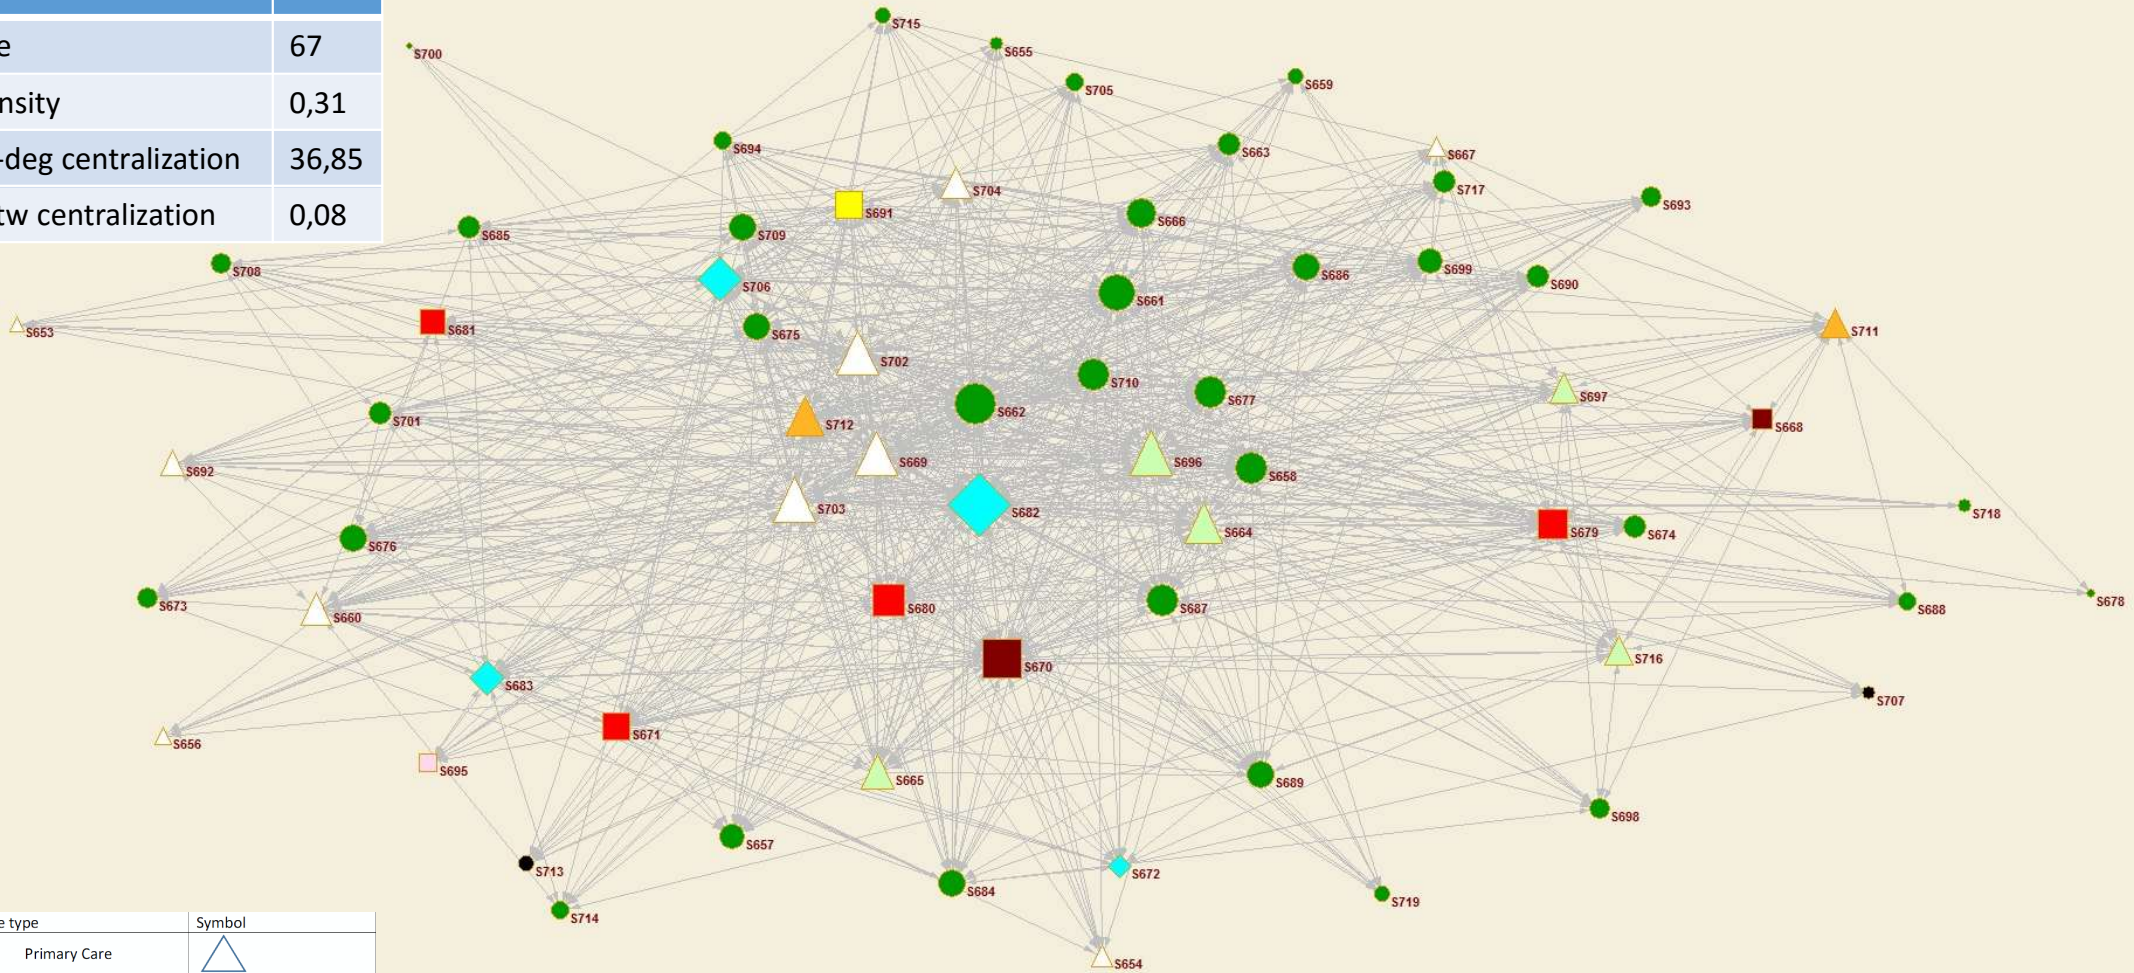

| Service type                   | Symbol |
|--------------------------------|--------|
| Primary Care                   | △      |
| Community Mental Health        | ▲      |
| Outreach Team                  | ◇      |
| Community rehabilitation       | ▴      |
| Social service                 | ●      |
| Ward in psychiatric hospital   | ■      |
| Psychiatric Ward General Hosp. | ■      |
| Sheltered accommodation        | ■      |
| Psychiatric Nursing Home       | ■      |
| Self-Help                      | ●      |
| Other                          | ●      |

|                        |            |
|------------------------|------------|
|                        | <b>P13</b> |
| Size                   | 77         |
| Density                | 0,17       |
| All-deg centralization | 44,45      |
| Betw centralization    | 0,23       |

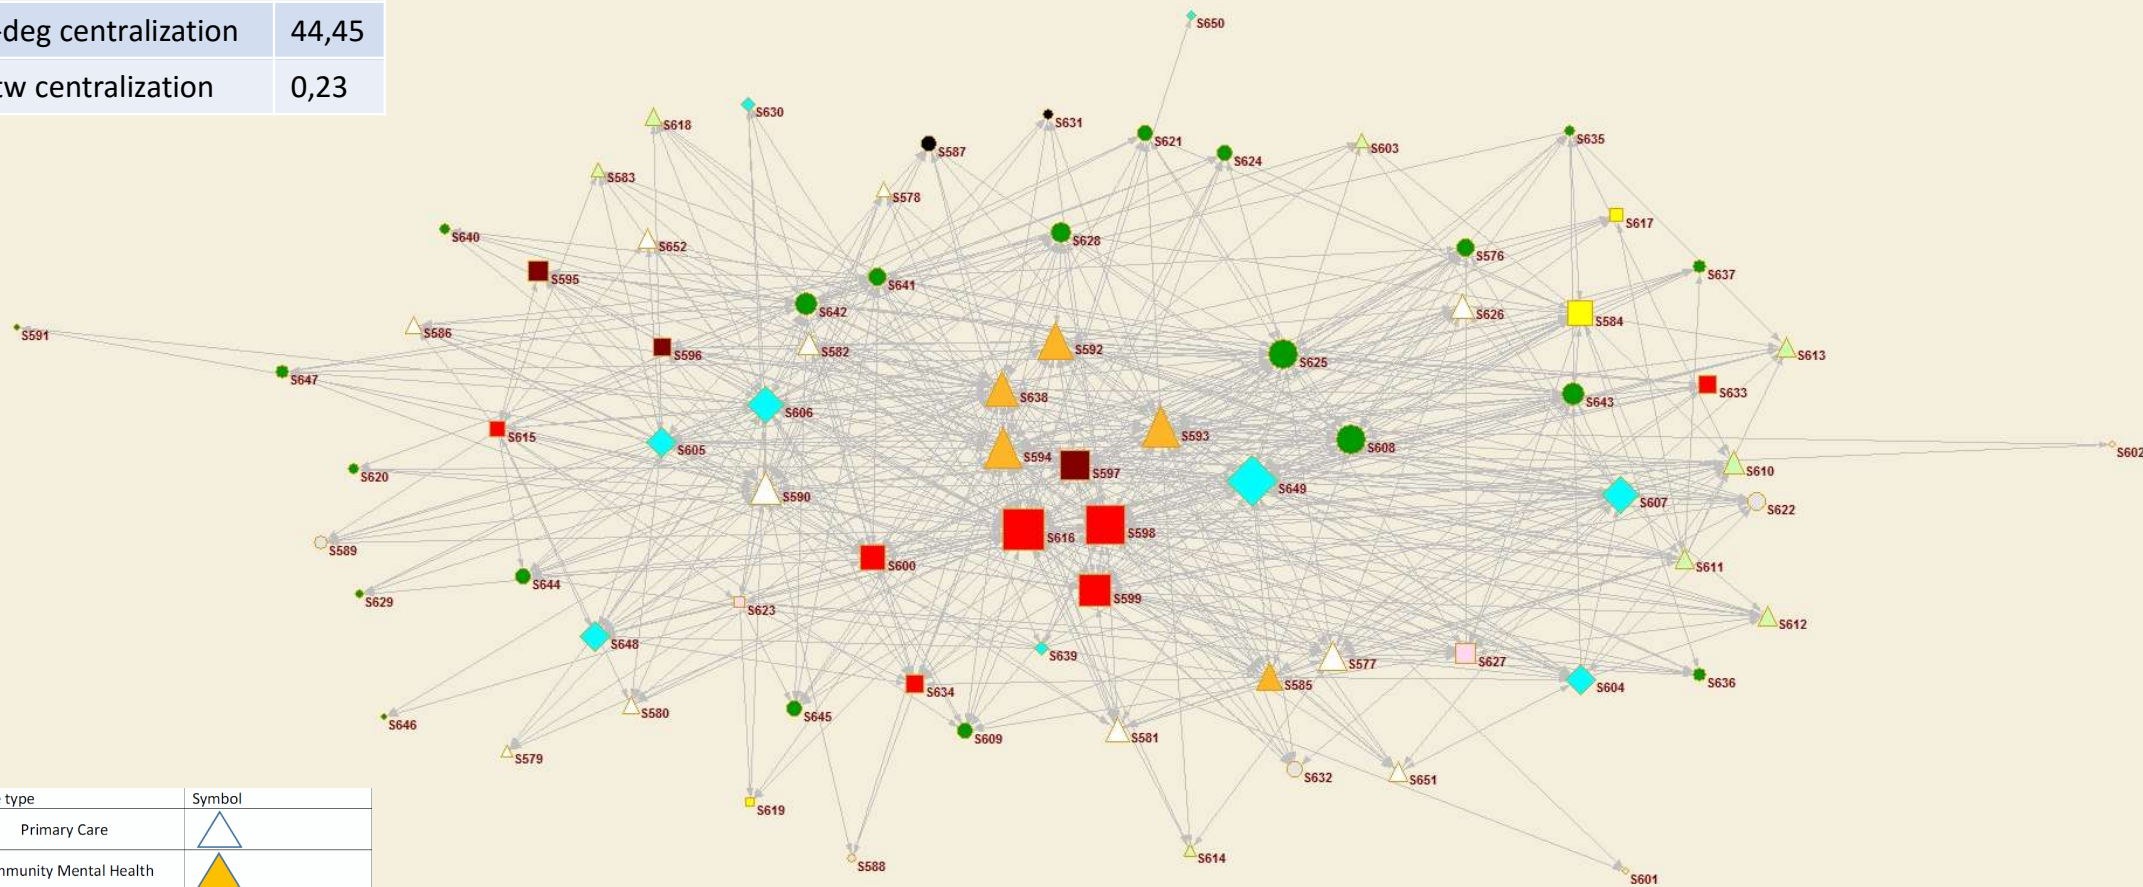

| Service type                   | Symbol                           |
|--------------------------------|----------------------------------|
| Primary Care                   | White triangle with blue outline |
| Community Mental Health        | Orange triangle                  |
| Outreach Team                  | Cyan diamond                     |
| Community rehabilitation       | Light green triangle             |
| Social service                 | Green circle                     |
| Ward in psychiatric hospital   | Red square                       |
| Psychiatric Ward General Hosp. | Brown square                     |
| Sheltered accommodation        | Yellow square                    |
| Psychiatric Nursing Home       | Pink square                      |
| Self-Help                      | Black circle                     |
| Other                          | Grey circle                      |

|                        |            |
|------------------------|------------|
|                        | <b>P15</b> |
| Size                   | 78         |
| Density                | 0,25       |
| All-deg centralization | 50,84      |
| Betw centralization    | 0,15       |

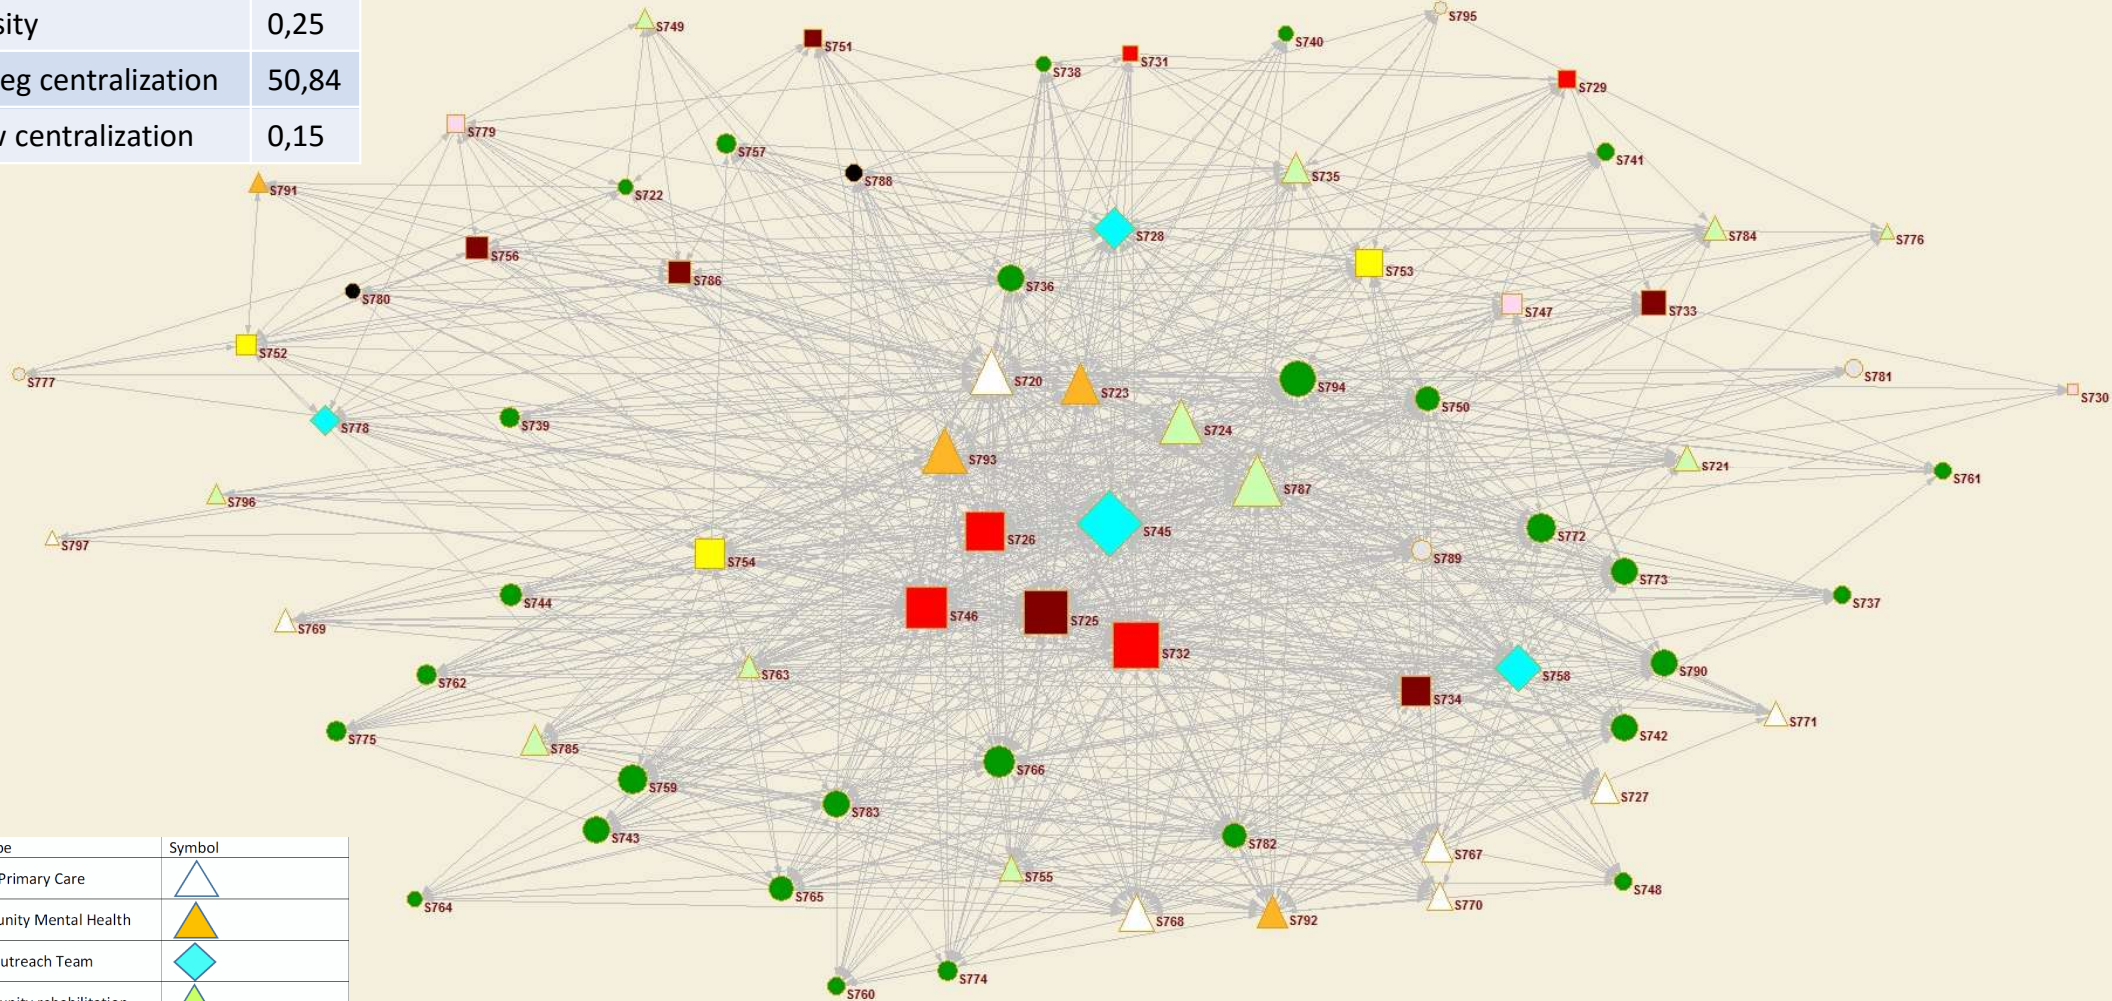

| Service type                   | Symbol |
|--------------------------------|--------|
| Primary Care                   |        |
| Community Mental Health        |        |
| Outreach Team                  |        |
| Community rehabilitation       |        |
| Social service                 |        |
| Ward in psychiatric hospital   |        |
| Psychiatric Ward General Hosp. |        |
| Sheltered accommodation        |        |
| Psychiatric Nursing Home       |        |
| Self-Help                      |        |
| Other                          |        |



|                        |           |
|------------------------|-----------|
|                        | <b>P1</b> |
| Size                   | 101       |
| Density                | 0,17      |
| All-deg centralization | 72,39     |
| Betw centralization    | 0,14      |

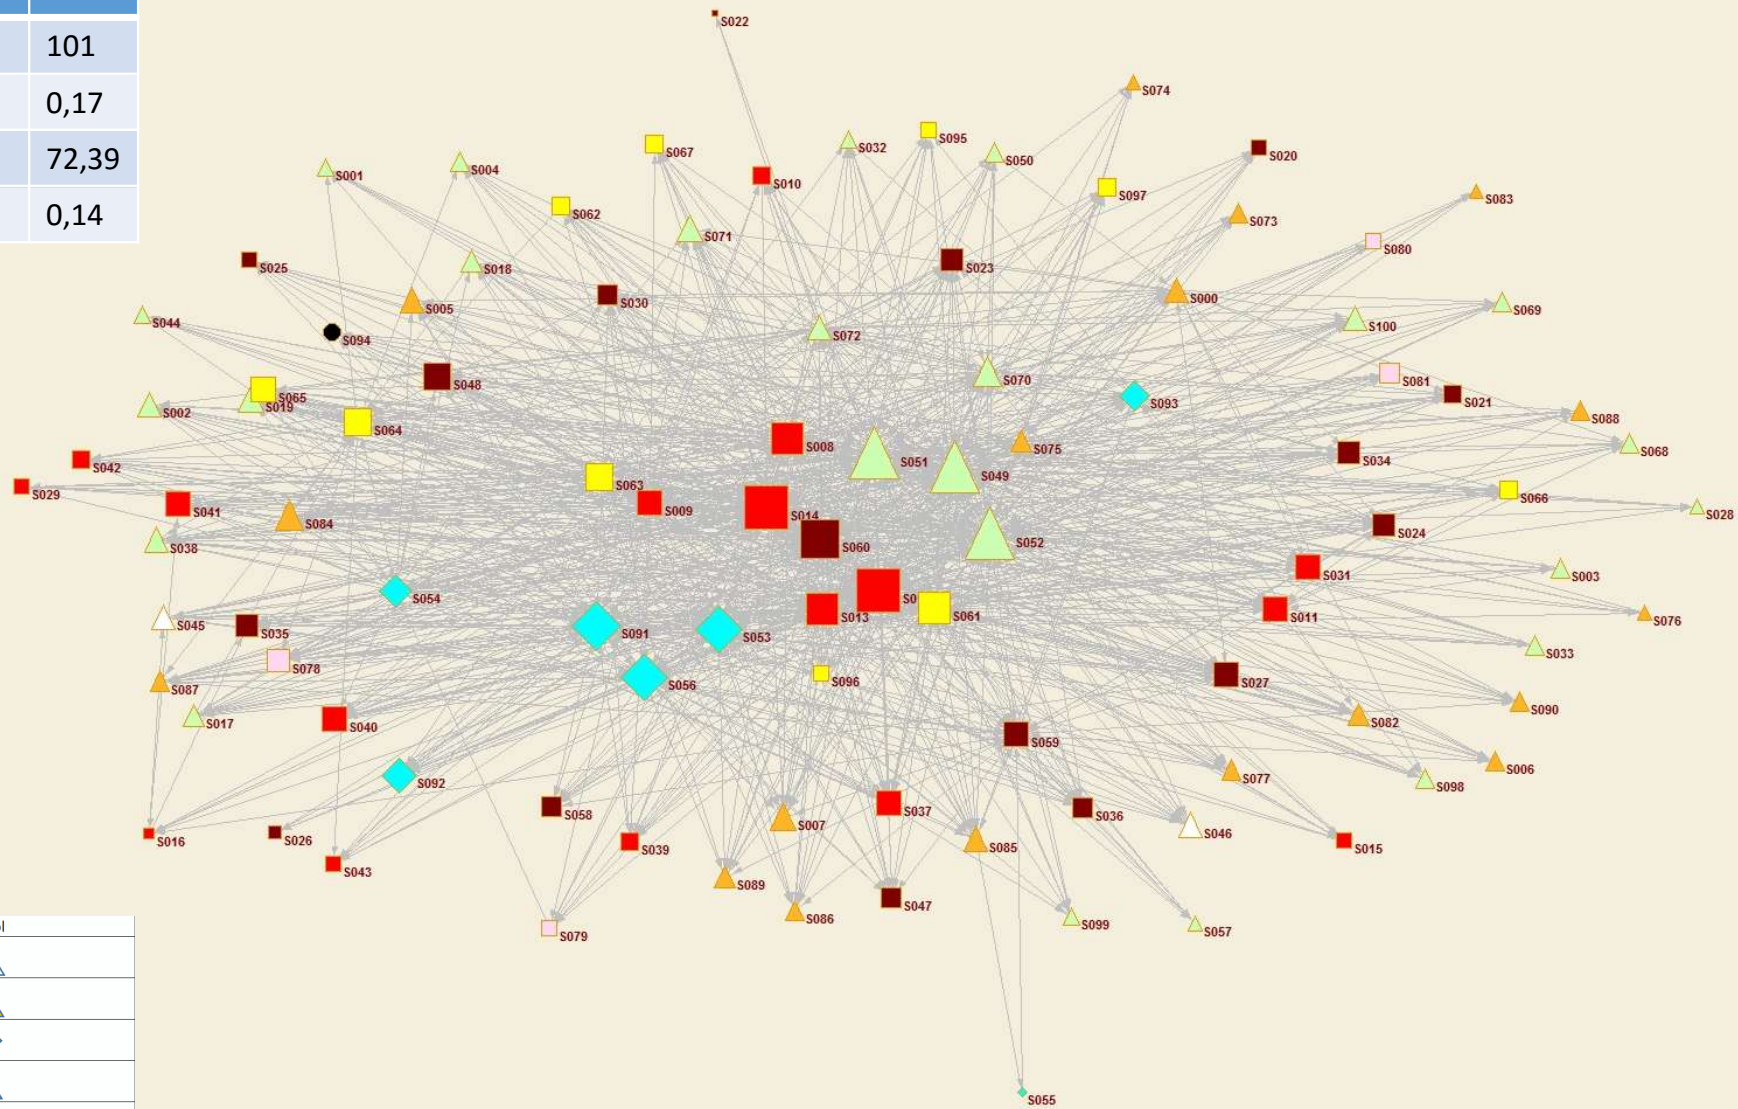

| Service type                   | Symbol               |
|--------------------------------|----------------------|
| Primary Care                   | Blue triangle        |
| Community Mental Health        | Orange triangle      |
| Outreach Team                  | Cyan diamond         |
| Community rehabilitation       | Light green triangle |
| Social service                 | Green circle         |
| Ward in psychiatric hospital   | Red square           |
| Psychiatric Ward General Hosp. | Brown square         |
| Sheltered accommodation        | Yellow square        |
| Psychiatric Nursing Home       | Pink square          |
| Self-Help                      | Black circle         |
| Other                          | Grey circle          |



|                        |           |
|------------------------|-----------|
|                        | <b>P2</b> |
| Size                   | 115       |
| Density                | 0,26      |
| All-deg centralization | 74,15     |
| Betw centralization    | 0,13      |

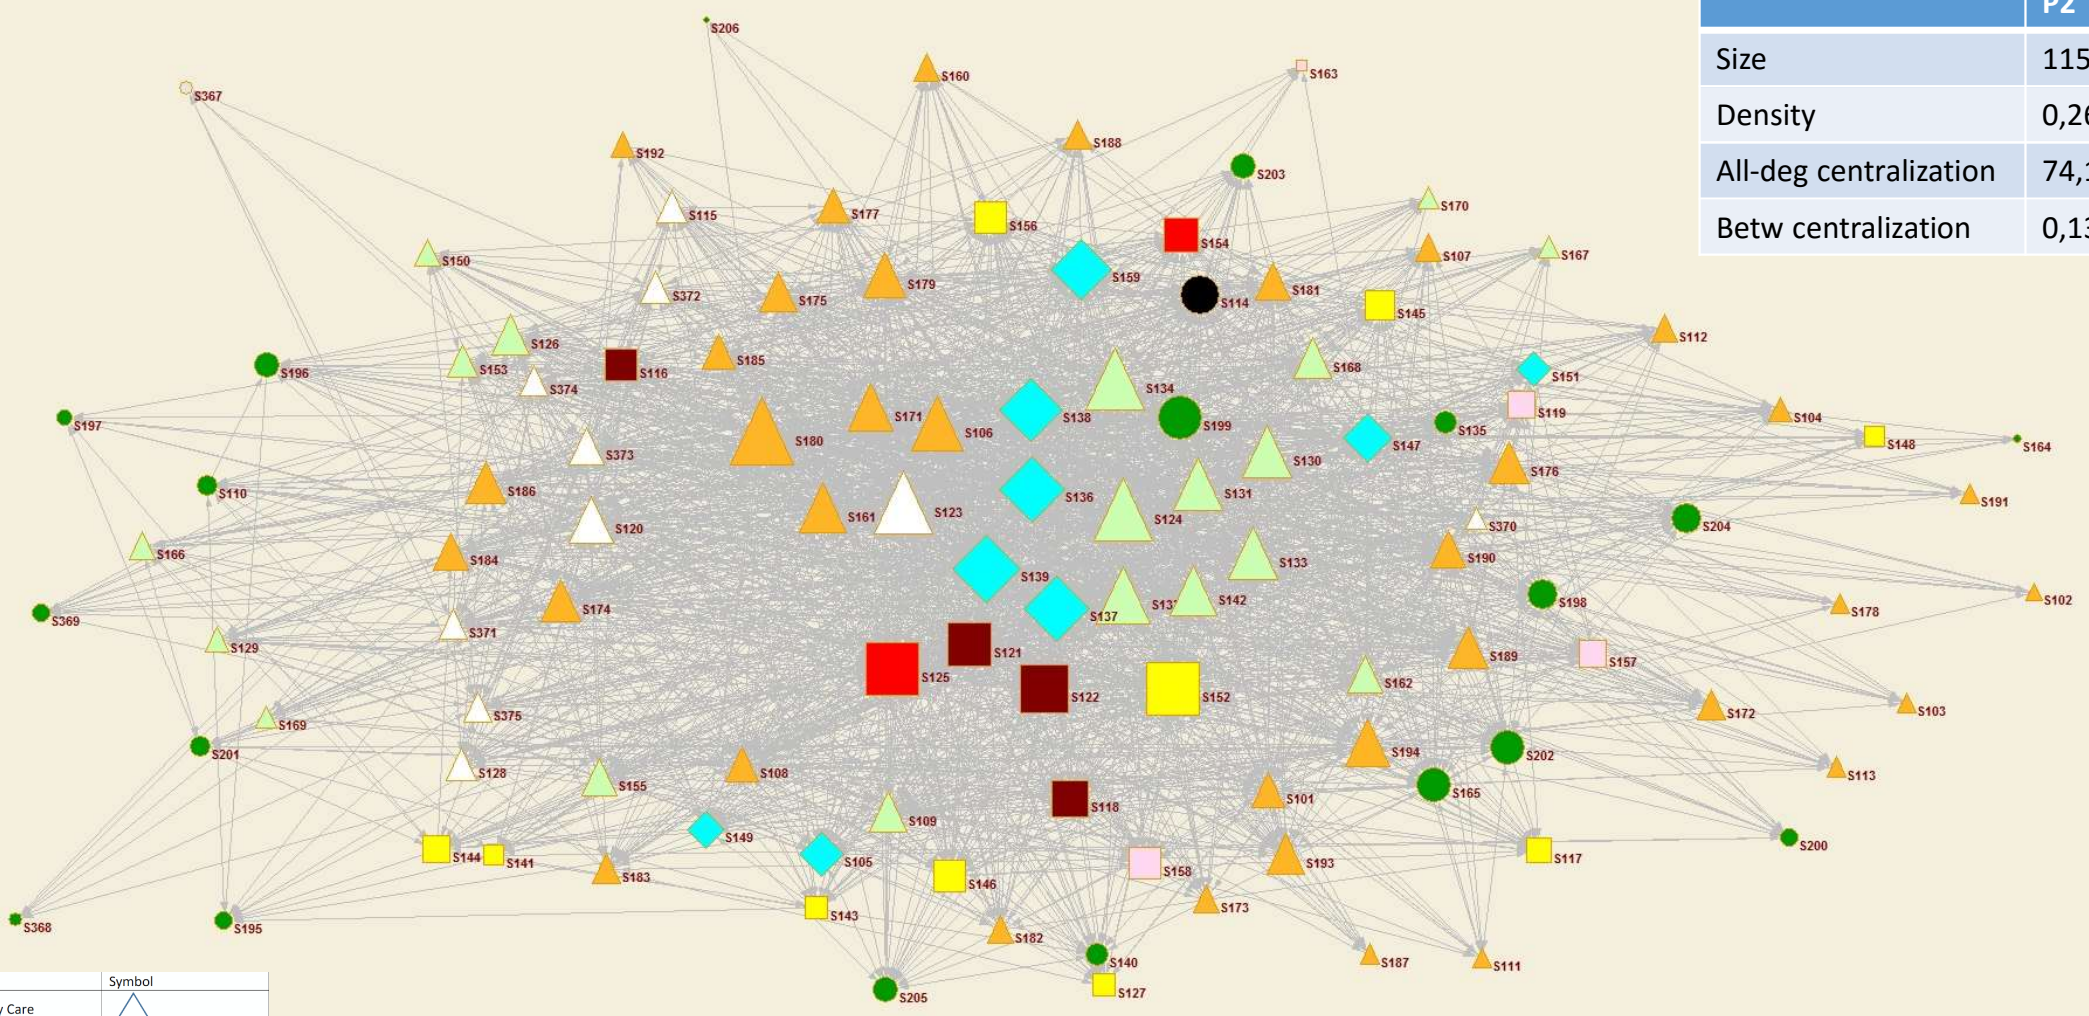

| Service type                   | Symbol               |
|--------------------------------|----------------------|
| Primary Care                   | White triangle       |
| Community Mental Health        | Orange triangle      |
| Outreach Team                  | Cyan diamond         |
| Community rehabilitation       | Light green triangle |
| Social service                 | Green circle         |
| Ward in psychiatric hospital   | Red square           |
| Psychiatric Ward General Hosp. | Brown square         |
| Sheltered accommodation        | Yellow square        |
| Psychiatric Nursing Home       | Pink square          |
| Self-Help                      | Black circle         |
| Other                          | Grey circle          |
